# Supplementary material for: Beta-blocker efficacy across different cardiovascular indications: an umbrella review and meta-analytic assessment
Source: PubMed Central journal article supplement (PMC7199339; doi:10.1186/s12916-020-01564-3), 2020-05-05
Supplement: 12916_2020_1564_MOESM1_ESM.pdf [file 12916_2020_1564_MOESM1_ESM.pdf]

## SUPPLEMENTAL MATERIAL

### **Beta-blocker efficacy across different cardiovascular indications: A systematic and meta-analytic assessment.**

BMC Medicine 2020; DOI : 10.1186/s12916-020-01564-3

Oliver J. Ziff, Monica Samra, James P. Howard, Daniel I. Bromage, Frank Ruschitzka, Darrel P. Francis and Dipak Kotecha\*

|                                                                                                   |           |
|---------------------------------------------------------------------------------------------------|-----------|
| <b>SUPPLEMENTAL METHODS</b> .....                                                                 | <b>2</b>  |
| SEARCH STRATEGY .....                                                                             | 2         |
| DATA COLLECTION, ANALYSIS AND EXTRACTION OF META-ANALYSES .....                                   | 3         |
| RISK OF BIAS AND QUALITY ASSESSMENT .....                                                         | 3         |
| ADDITIONAL STATISTICAL METHODS .....                                                              | 3         |
| <b>SUPPLEMENTAL TABLES</b> .....                                                                  | <b>4</b>  |
| SUPPLEMENTAL TABLE 1: DETAILS OF INCLUDED META-ANALYSES.....                                      | 4         |
| SUPPLEMENTAL TABLE 2: DETAILS OF EXCLUDED META-ANALYSES .....                                     | 12        |
| SUPPLEMENTAL TABLE 3: ROBIS RESULTS FOR EACH INDIVIDUAL SYSTEMATIC REVIEW AND META-ANALYSIS ..... | 16        |
| SUPPLEMENTAL TABLE 4: GRADE SCALE FOR ASSESSMENT OF CERTAINTY OF EVIDENCE.....                    | 20        |
| <b>SUPPLEMENTAL FIGURES</b> .....                                                                 | <b>23</b> |
| SUPPLEMENTAL FIGURE 1. PRISMA FLOW DIAGRAM.....                                                   | 23        |
| SUPPLEMENTAL FIGURE 2. ROBIS RESULTS FROM META-ANALYSES IN EACH CARDIOVASCULAR CONDITION.....     | 24        |
| SUPPLEMENTAL FIGURE 3: CORONARY ARTERY DISEASE META-ANALYSES.....                                 | 25        |
| SUPPLEMENTAL FIGURE 4: HEART FAILURE META-ANALYSES .....                                          | 26        |
| SUPPLEMENTAL FIGURE 5: PERIOPERATIVE RISK REDUCTION META-ANALYSES .....                           | 28        |
| SUPPLEMENTAL FIGURE 6: HYPERTENSION META-ANALYSES.....                                            | 30        |
| SUPPLEMENTAL FIGURE 7: HYPERTENSION META-ANALYSES ACCORDING TO BETA-BLOCKER TYPE.....             | 32        |
| <b>SUPPLEMENTAL REFERENCES</b> .....                                                              | <b>33</b> |

\* Correspondence: [d.kotecha@bham.ac.uk](mailto:d.kotecha@bham.ac.uk)

# Supplemental Methods

## Search strategy

A systematic review of MEDLINE, EMBASE and the Cochrane Library were performed for randomised controlled trials (RCTs). The dates for this search were initially from inception of each database until April 2016, and then subsequently extended to December 2018. The search strategy included broad keywords and MeSH terms in four stages: (i) beta-blockers, including individual drug names; (ii) cardiovascular disease in general and also the specific named cardiovascular conditions; (iii) meta-analysis; and (iv) limitation to adults. We also manually searched reference lists of relevant studies, investigated registers of on-going trials and included studies after discussion with content experts.

| MEDLINE                                                                        | EMBASE                                                                                                    | Cochrane                                                                   |
|--------------------------------------------------------------------------------|-----------------------------------------------------------------------------------------------------------|----------------------------------------------------------------------------|
| <b>(i) beta-blockers</b>                                                       |                                                                                                           |                                                                            |
| exp adrenergic beta-antagonists/<br>beta blocker*.mp.                          | exp beta adrenergic receptor blocking agent/<br>beta blocker*.mp.                                         | adrenergic beta-antagonists<br>beta blocker                                |
| beta receptor antagonist*.mp.                                                  | beta receptor antagonist*.mp.                                                                             | beta receptor antagonist                                                   |
| acebutolol.mp.                                                                 | acebutolol.mp.                                                                                            | acebutolol                                                                 |
| atenolol.mp.                                                                   | atenolol.mp.                                                                                              | atenolol                                                                   |
| bisoprolol.mp.                                                                 | bisoprolol.mp.                                                                                            | bisoprolol                                                                 |
| bucindolol.mp.                                                                 | bucindolol.mp.                                                                                            | bucindolol                                                                 |
| carteolol.mp.                                                                  | carteolol.mp.                                                                                             | carteolol                                                                  |
| carvedilol.mp.                                                                 | carvedilol.mp.                                                                                            | carvedilol                                                                 |
| celiprolol.mp.                                                                 | celiprolol.mp.                                                                                            | celiprolol                                                                 |
| esmolol.mp.                                                                    | esmolol.mp.                                                                                               | esmolol                                                                    |
| labetalol.mp.                                                                  | labetalol.mp.                                                                                             | labetalol                                                                  |
| metoprolol.mp.                                                                 | metoprolol.mp.                                                                                            | metoprolol                                                                 |
| nadolol.mp.                                                                    | nadolol.mp.                                                                                               | nadolol                                                                    |
| nebivolol.mp.                                                                  | nebivolol.mp.                                                                                             | nebivolol                                                                  |
| propranolol.mp.                                                                | propranolol.mp.                                                                                           | propranolol                                                                |
| <b>(ii) cardiovascular disease</b>                                             |                                                                                                           |                                                                            |
| exp cardiovascular diseases/<br>thoracic surgery/<br>exp stroke/<br>angina.mp. | exp cardiovascular disease/<br>exp cardiovascular surgery/<br>exp cerebrovascular accident/<br>angina.mp. | cardiovascular diseases<br>thoracic surgery<br>stroke<br>angina            |
| heart failure.mp.                                                              | heart failure.mp.                                                                                         | heart failure                                                              |
| atrial fibrillation.mp.                                                        | atrial fibrillation.mp.                                                                                   | atrial fibrillation                                                        |
| myocardial infarction.mp.                                                      | myocardial infarction.mp.                                                                                 | myocardial infarction                                                      |
| acute coronary syndrome.mp.                                                    | acute coronary syndrome.mp.                                                                               | acute coronary syndrome                                                    |
| hypertension.mp.                                                               | hypertension.mp.                                                                                          | hypertension                                                               |
| cardiac surgery.mp.                                                            | cardiac surgery.mp.                                                                                       | cardiac surgery                                                            |
| stroke*.mp.                                                                    | stroke*.mp.                                                                                               | stroke                                                                     |
|                                                                                |                                                                                                           | prevention                                                                 |
|                                                                                |                                                                                                           | perioperative                                                              |
| <b>(iii) meta-analysis</b>                                                     |                                                                                                           |                                                                            |
| meta-analysis/<br>meta-analysis as topic/<br>(meta analy* or metaanaly*).mp.   | meta analysis/<br>"meta analysis (topic)"/<br>(meta analy* or metaanaly*).mp.                             | meta-analysis<br>meta-analysis as topic<br>(meta analysis or metaanalysis) |
| <b>(iv) limitation to adults</b>                                               |                                                                                                           |                                                                            |
| limit to "all adult (19 plus years)"                                           | limit to (adult 18 to 64 years or aged 65+ years)                                                         | limit to adult                                                             |

## **Data collection, analysis and extraction of meta-analyses**

Two investigators (OJZ, MS) independently examined the eligibility of all titles and abstracts of meta-analyses identified by the search strategy. Data were then independently extracted and tabulated in a standardised extraction form. Differences and missing data were resolved by group discussion, reference to the original publication and additional independent adjudication (DK).

All data were extracted from meta-analyses, including crude and adjusted outcome data where available. For coronary artery disease (CAD) trials were classified into acute myocardial infarction (MI) trials (if randomised within 48 hours of symptom onset) or non-acute trials (if >48 hours of symptoms), and by whether the majority of patients received reperfusion (pre-reperfusion trials if <50% of patients received reperfusion either with thrombolytics or coronary intervention, and reperfusion if  $\geq 50\%$ ). In heart failure (HF), we assessed according to clinical subgroups: age, left ventricular ejection fraction (LVEF), heart rhythm and concomitant conditions. Perioperative studies were grouped by type of surgery (cardiac and non-cardiac) and risk of bias. Many meta-analyses for non-cardiac surgery include the Dutch Echocardiographic Cardiac Risk Evaluation Applying Stress Echocardiography (DECREASE) studies, which the sponsor declared as subject to potential scientific misconduct[1]; meta-analyses containing these studies were therefore defined as high risk. In hypertension, we considered different control groups (placebo, renin-angiotensin system [RAS] antagonists, calcium channels blockers [CCB] and diuretics), and performed a post-hoc sensitivity analysis according to beta-blocker agent (atenolol versus other beta-blockers).

## **Risk of bias and quality assessment**

Two authors (DIB, JPH) independently assessed meta-analysis quality using the AMSTAR instrument (A Measurement Tool to Assess Multiple Systematic Reviews)[2] and the ROBIS tool (Risk of Bias in Systematic Reviews),[3] which address key criteria such as eligibility criteria, study identification and selection, study appraisal, data extraction and synthesis. Risk of bias in the individual RCTs was assessed with the Cochrane risk of bias tool.[4]

## **Additional statistical methods**

Risk ratio (RR): Where the RR could not be calculated due to crude event data being unreported, we imputed the adjusted RR from the study, or converted the odds ratio to RR using published methods:  $RR = OR / ([1 - p_{Ref}] + [p_{Ref} * OR])$ , where  $p_{Ref}$  is the prevalence of the outcome in the reference group.[5] There was insufficient reporting of hazard ratios to allow comparison across trials, and hence these were not used in analysis.

## Supplemental Table 1: Details of included meta-analyses

| INCLUDED STUDY                 | Population                                | Inclusion population definition                                                                              | Primary outcome       | Beta-blocker         | Control                    | Studies n | Beta-blocker n | Control n | Follow-up (years)* | ROBIS Bias Risk | AMSTAR Quality score |
|--------------------------------|-------------------------------------------|--------------------------------------------------------------------------------------------------------------|-----------------------|----------------------|----------------------------|-----------|----------------|-----------|--------------------|-----------------|----------------------|
| <i>Coronary Artery Disease</i> |                                           |                                                                                                              |                       |                      |                            |           |                |           |                    |                 |                      |
| Al-Reesi 2008 [6]              | Acute MI (not defined)                    | Randomised within 72 hours post MI                                                                           | 6 week mortality      | Any                  | Placebo or no Tx           | 18        | 37,358         | 37,286    | 1.17               | HIGH            | 6/11                 |
| Bangalore 2014 [7]             | Acute MI (not defined)                    | RCTs >100 patients                                                                                           | All-cause mortality   | Any                  | Placebo, no Tx or other Tx | 60        | 15,004         | 20,642    | 9.77               | HIGH            | 6/11                 |
| Brandler 2010 [8]              | Acute coronary syndrome                   | Randomised within 24 hours post MI                                                                           | In-hospital mortality | $\beta$ 1 antagonist | Placebo or no Tx           | 18        | 36,173         | 36,076    | 9.77               | LOW             | 5/11                 |
| Chatterjee 2013 [9]            | acute or suspected ACS with <48h onset    | Randomised IV BB started <48hr after ACS onset.                                                              | In-hospital mortality | Any                  | Placebo or no Tx           | 16        | 36,737         | 36,659    | 0.69               | LOW             | 7/11                 |
| Elgendy 2016[10]               | STEMI undergoing PCI, Killip class 1 or 2 | RCTs of IV BB vs placebo                                                                                     | All-cause mortality   | Any                  | Placebo or no Tx           | 4         | 572            | 577       | 0.08               | LOW             | 8/11                 |
| Freemantle 1999 [11]           | Acute or past MI                          | RCTs without crossover. Tx >1day                                                                             | All-cause mortality   | Any                  | Placebo or no Tx           | 82        | 27,372         | 26,701    | 1.87               | HIGH            | 8/11                 |
| Houghton 2000 [12]             | HF post-MI                                | RCTs >50 patients. Started on BB or control post-MI on treatment for >1 month                                | All-cause mortality   | Any                  | Placebo or no Tx           | 17        | 5408           | 5451      | 0.52               | LOW             | 5/11                 |
| Huang HL 2012 [13]             | Stable angina                             | RCTs, Treatment duration >3 weeks.                                                                           | CV mortality          | Any                  | Placebo                    | 89        | 1186           | 1129      | 9.35               | HIGH            | 3/11                 |
| Olsson 1992 [14]               | Acute MI (not defined) with <48h onset    | RCTs, placebo-controlled, metoprolol in acute treatment of MI                                                | All-cause mortality   | Metoprolol           | Placebo                    | 5         | 2753           | 2721      | 4.28               | HIGH            | 3/11                 |
| Paladino 2010 [15]             | STEMI given BB within 8hrs                | RCTs, STEMI patients                                                                                         | In-hospital mortality | Any                  | Placebo or no Tx           | 18        | 36173          | 36076     | 0.62               | LOW             | 2/11                 |
| Perez 2009[16]                 | ACS, LVF, dissection, stroke              | Antihypertensive started within 24hrs of onset of acute event. Mortality data at 2 days, 10 days or >30days. | All-cause mortality   | Any                  | Placebo or no Tx           | 65        | 9273           | 9208      | 0.79               | LOW             | 10/11                |
| Soriano 1997 [17]              | Post-MI                                   | RCT providing data on mortality. Published and unpublished data included                                     | All-cause mortality   | Any                  | Placebo                    | 73        | 26036          | 25527     | 0.16               | HIGH            | 4/11                 |

| INCLUDED STUDY       | Population                       | Inclusion population definition                                                                         | Primary outcome                         | Beta-blocker | Control                    | Studies n | Beta-blocker n | Control n | Follow-up (years)* | ROBIS Bias Risk | AMSTAR Quality score |
|----------------------|----------------------------------|---------------------------------------------------------------------------------------------------------|-----------------------------------------|--------------|----------------------------|-----------|----------------|-----------|--------------------|-----------------|----------------------|
| <i>Heart Failure</i> |                                  |                                                                                                         |                                         |              |                            |           |                |           |                    |                 |                      |
| Abdulla 2006 [18]    | Symptomatic HF. LVEF<45% on ACEi | RCT, Tx duration >12weeks                                                                               | NYHA class and ETT                      | Any          | Placebo                    | 28        | 3727           | 3237      | 0.5                | HIGH            | 6/11                 |
| Al-Gobari 2013 [19]  | HF (EF not specified)            | RCT, Tx duration >30 days with >3 months f/u                                                            | Sudden death                            | Any          | Placebo, no Tx or other Tx | 30        | 12768          | 12011     | 1                  | LOW             | 6/11                 |
| Azevum 1998 [20]     | HFrEF                            | RCT                                                                                                     | All-cause mortality                     | Any          | Placebo                    | 18        | 1606           | 1235      | 1.1                | HIGH            | 2/11                 |
| Badve 2011 [21]      | HFrEF and CKD                    | RCT, CKD stage 3-5, f/u >3 months. Reported mortality outcomes.                                         | All-cause mortality                     | Any          | Placebo, no Tx or other Tx | 8         | 2868           | 2834      | 1                  | LOW             | 5/11                 |
| Bavishi 2014 [22]    | HF with LVEF >40%                | RCTs + prospective/retrospective cohort studies.                                                        | All-cause mortality                     | Any          | Placebo                    | 17        | n/s            | n/s       | 2.5                | LOW             | 8/11                 |
| Bell 2006 [23]       | HFrEF, 25% with diabetes         | RCTs, placebo-controlled, Carvedilol as BB, HF due to LV systolic dysfunction.                          | All-cause mortality                     | Carvedilol   | Placebo                    | 7         | 3034           | 2723      | 1                  | HIGH            | 4/11                 |
| Burnett 2017[24]     | HFrEF                            | Network meta-analysis of medical therapies in HF                                                        | All-cause mortality                     | Any          | Placebo                    | 57        | n/s            | n/s       | 1                  | LOW             | 4/11                 |
| Bonet 2000 [25]      | HF (EF not specified)            | RCT parallel or crossover design, BB devoid of intrinsic sympathomimetic activity, Tx duration >8 weeks | All-cause mortality                     | Any          | Placebo, no Tx or other Tx | 21        | 3130           | 2719      | 0.5                | HIGH            | 5/11                 |
| Bouzamond 2003 [26]  | HF (EF not specified)            | RCTs parallel design; data on mortality and hospitalisation outcomes                                    | All-cause mortality, HF hospitalisation | Any          | Placebo                    | 16        | 7630           | 7227      | 1.2                | HIGH            | 1/11                 |
| Brophy 2001 [27]     | HF with LVEF <45%                | RCT                                                                                                     | All-cause mortality; HF hospitalisation | Any          | Placebo                    | 22        | 5273           | 4862      | 0.5                | LOW             | 4/11                 |
| Cleland 2018[28]     | IPD: HF with mean EF 27%         | RCTs >300 patients, f/u >6 months, subgroup AF vs sinus rhythm, reported mortality, symptomatic HF      | All-cause mortality                     | Any          | Placebo                    | 11        | 5,581          | 8,315     | 1.5                | LOW             | 10/11                |
| Cleophas 2001 [29]   | HFrEF                            | RCT, mortality reported                                                                                 | All-cause mortality                     | Any          | Placebo                    | 4         | 3813           | 3679      | 1                  | UNCLEAR         | 2/11                 |
| Dulin 2005 [30]      | HFrEF                            | RCT, subgroup >60 versus <60 years of age                                                               | All-cause mortality                     | Any          | Placebo                    | 5         | n/s            | n/s       | 1                  | HIGH            | 3/11                 |
| Fauchier 2007 [31]   | HFrEF                            | RCT, subgroup ischaemic vs non-ischaemic aetiology. Mortality reported, f/u > 6months                   | All-cause mortality                     | Any          | Placebo                    | 8         | 3,792          | 3,458     | 1                  | LOW             | 4/11                 |

| INCLUDED STUDY                     | Population               | Inclusion population definition                                                                           | Primary outcome          | Beta-blocker | Control          | Studies n | Beta-blocker n | Control n | Follow-up (years)* | ROBIS Bias Risk | AMSTAR Quality score |
|------------------------------------|--------------------------|-----------------------------------------------------------------------------------------------------------|--------------------------|--------------|------------------|-----------|----------------|-----------|--------------------|-----------------|----------------------|
| Fukuta 2016 [32]                   | HFpEF                    | Compared observational studies and RCTs in HFpEF                                                          | All-cause mortality      | Any          | Placebo          | 3         | 519            | 527       | 2                  | LOW             | 9/11                 |
| Haas 2003 [33]                     | HFrfEF                   | RCT >100 pts, subgroup diabetic vs non-diabetic, mortality outcome reported in diabetic subgroup          | All-cause mortality      | Any          | Placebo          | 6         | n/s            | n/s       | 1.2                | LOW             | 3/11                 |
| Heidenreich 1997 [34]              | HFrfEF                   | Parallel RCT, duration >3months, BB without intrinsic sympathomimetic activity, mortality reported        | All-cause mortality      | Any          | Placebo          | 17        | 1723           | 1316      | 0.5                | HIGH            | 3/11                 |
| Kotecha 2014[35]/2016[36]/2017[37] | IPD: HF with mean EF 27% | RCTs >300 patients, f/u >6 months, subgroup AF vs sinus rhythm, reported mortality, symptomatic HF        | All-cause mortality      | Any          | Placebo          | 11        | 5,581          | 8,315     | 1.5                | LOW             | 10/11                |
| Krum 2005 [38]                     | HFrfEF                   | RCT, >200 patients, reporting mortality, subgroup ACE/ARB vs no ACE/ARB and ACEi Tx duration ≤90/>90 days | All-cause mortality      | Any          | Placebo          | 12        | 6,843          | 6,527     | 1.4                | LOW             | 4/11                 |
| Lechat 1998 [39]                   | HFrfEF                   | RCT parallel design                                                                                       | All-cause mortality      | Any          | Placebo          | 18        | 1718           | 1305      | 0.6                | HIGH            | 5/11                 |
| Lee 2001 [40]                      | HFrfEF                   | RCT, reporting mortality                                                                                  | All-cause mortality      | Any          | Placebo          | 6         | 4735           | 4436      | 1.3                | HIGH            | 4/11                 |
| Liu 2014 [41]                      | HF with LVEF >40%        | RCT reporting mortality or hospitalisation outcomes, f/u>6months                                          | All-cause mortality      | Any          | Placebo or no Tx | 12        | 7834           | 13030     | 2.1                | LOW             | 7/11                 |
| Martin 2018[42]                    | HF with LVEF >40%        | RCTs with parallel group design enrolling adults                                                          | Cardiovascular mortality | Any          | Placebo or no Tx | 10        | 550            | 555       | 2.7                | LOW             | 10/11                |
| McAlister 2009 [43]                | HFrfEF                   | RCT reporting mortality                                                                                   | All-cause mortality      | Any          | Placebo          | 23        | 9820           | 9389      | 1                  | LOW             | 6/11                 |
| Nasr 2006 [44]                     | HFrfEF                   | RCTs with parallel design, reporting AF incidence                                                         | Occurrence of new AF     | Any          | Placebo          | 7         | 6007           | 5944      | 1.4                | LOW             | 6/11                 |
| O'Connor 2011 [45]                 | HFrfEF                   | RCTs, primary endpoint of mortality. ITT analysis, Subgroup U.S.A. vs rest of world                       | All-cause mortality      | Any          | Placebo          | 4         | 5827           | 5808      | 1.5                | LOW             | 4/11                 |
| Rienstra 2013 [46]                 | HF with LVEF <40%        | RCTs, subgroup AF vs sinus rhythm, AF confirmed on ECG                                                    | All-cause mortality      | Any          | Placebo          | 4         | 4,482          | 4,198     | 0.75               | LOW             | 7/11                 |
| Shekelle 2003 [47]                 | HFrfEF                   | 5 selected RCTs, >12 weeks duration                                                                       | All-cause mortality      | Any          | Placebo          | 5         | n/s            | n/s       | 0.25               | HIGH            | 4/11                 |

| INCLUDED STUDY           | Population          | Inclusion population definition                                                                     | Primary outcome                                              | Beta-blocker | Control                    | Studies n | Beta-blocker n | Control n | Follow-up (years)* | ROBIS Bias Risk | AMSTAR Quality score |
|--------------------------|---------------------|-----------------------------------------------------------------------------------------------------|--------------------------------------------------------------|--------------|----------------------------|-----------|----------------|-----------|--------------------|-----------------|----------------------|
| Shibata 2001 [48]        | HFrEF               | Published parallel RCTs                                                                             | All-cause mortality                                          | Any          | Placebo or no Tx           | 22        | 5507           | 4973      | 0.9                | HIGH            | 4/11                 |
| Van Veldhuisen 2013 [49] | HF with LVEF >40%   | RCTs, patients on ACEi + diuretics                                                                  | All-cause mortality                                          | Any          | Placebo                    | 3         | 519            | 529       | 2.7                | HIGH            | 5/11                 |
| Wali 2011 [50]           | HFrEF               | RCT, subgroup CKD vs no CKD                                                                         | All-cause mortality                                          | Carvedilol   | Placebo                    | 2         | 2,115          | 2,102     | 1.1                | HIGH            | 3/11                 |
| Whorlow 2000 [51]        | HFrEF NYHA class 4  | Published RCT, patients on ACEi, diuretics ± digoxin. Tx duration >3 months                         | All-cause mortality                                          | Any          | Placebo                    | 18        | 313            | 322       | 0.75               | LOW             | 3/11                 |
| Zaman 2017 [52]          | All HF              | RCTs calculating excess mortality from deferring medical therapy for 1 year                         | All-cause mortality                                          | Any          | Placebo                    | 21        | n/s            | n/s       | 11.73              | LOW             | 5/11                 |
| <i>Perioperative</i>     |                     |                                                                                                     |                                                              |              |                            |           |                |           |                    |                 |                      |
| Angeli 2010 [53]         | Non-cardiac surgery | RCTs reporting mortality                                                                            | All-cause mortality                                          | Any          | Placebo                    | 9         | 5274           | 5270      | 0.076              | LOW             | 10/11                |
| Angeli 2010 [54]         | Non-cardiac surgery | RCTs reporting CV and all-cause mortality                                                           | CV mortality; all-cause mortality                            | Any          | Placebo, no Tx or other Tx | 24        | 6623           | 6325      | 0.076              | UNCLEAR         | 3/11                 |
| Arsenault 2013 [55]      | Cardiac-surgery     | RCTs, no history of chronic AF                                                                      | Post-op AF or SVT                                            | Any          | Placebo, no Tx or other Tx | 33        | 2294           | 2404      | 0.058              | LOW             | 11/11                |
| Badgett 2010 [56]        | Cardiac-surgery     | Revised Cardiac Index of ≥1. BB administered before induction of anaesthesia and continued post-op  | Total mortality; stroke during hospitalisation               | Any          | Placebo, no Tx or other Tx | 7         | 5457           | 5455      | n/s                | LOW             | 5/11                 |
| Bangalore 2008 [57]      | Non-cardiac surgery | RCTs, BB started in peri-op period, ±CV comorbidities, assessed outcomes within 30 days of surgery  | 20-day ACM, CV mortality, non-fatal MI, non-fatal stroke, HF | Any          | Placebo, no Tx or other Tx | 33        | 6311           | 5995      | 0.066              | LOW             | 10/11                |
| Biccard 2008 [58]        | Non-cardiac surgery | Selected studies from five recent systematic reviews reporting either CV mortality or non-fatal MI. | CV mortality, non-fatal MI at 30 days                        | Any          | Placebo                    | 8         | 976            | 955       | 0.083              | LOW             | 5/11                 |
| Blessberger 2014 [59]    | Any surgery         | RCTs, subgroup cardiac vs non-cardiac surgery. >70% under GA. Peri-op period is ±30 days            | All-cause mortality                                          | Any          | Placebo, no Tx or other Tx | 89        | 7769           | 7477      | 0.083              | LOW             | 11/11                |
| Bouri 2014 [60]          | Non-cardiac surgery | BB initiated in pre-op period.                                                                      | All-cause mortality                                          | Any          | Placebo                    | 9         | 5264           | 5265      | 0.083              | LOW             | 9/11                 |

| INCLUDED STUDY         | Population          | Inclusion population definition                                                                           | Primary outcome                               | Beta-blocker | Control                    | Studies n | Beta-blocker n | Control n | Follow-up (years)* | ROBIS Bias Risk | AMSTAR Quality score |
|------------------------|---------------------|-----------------------------------------------------------------------------------------------------------|-----------------------------------------------|--------------|----------------------------|-----------|----------------|-----------|--------------------|-----------------|----------------------|
| Dai 2014 [61]          | Non-cardiac surgery | RCTs, $\geq 1$ risk-factor for CAD, reported ACM, MI or stroke                                            | ACM, MI $\pm$ stroke                          | Any          | Placebo                    | 8         | 5457           | 5723      | 0.17               | HIGH            | 7/11                 |
| Devereaux 2005 [62]    | Non-cardiac surgery | RCTs                                                                                                      | All-cause mortality, adverse effects          | Any          | Placebo                    | 4         | 453            | 454       | 0.046              | LOW             | 8/11                 |
| Guay 2013 [63]         | Any surgery         | RCT, reported mortality at 30 days and 1yr.                                                               | All-cause mortality                           | Any          | Placebo                    | 12        | 5550           | 5551      | 0.20               | HIGH            | 7/11                 |
| Ji 2016 [64]           | CABG                | RCTs reporting new-onset                                                                                  | New-onset AF                                  | Any          | Placebo                    | 13        | 1158           | 1199      | n/s                | HIGH            | 8/11                 |
| Khan 2013 [65]         | Cardiac surgery     | RCTs reporting AF or SVT                                                                                  | AF or SVT                                     | Any          | Placebo or no Tx           | 10        | 1280           | 1276      | n/s                | HIGH            | 9/11                 |
| Landoni 2010 [66]      | Non-cardiac surgery | RCTs, no restriction to dose/time of administration.                                                      | AF or SVT                                     | Esmolol      | Placebo or no Tx           | 32        | 853            | 912       | n/s                | HIGH            | 6/11                 |
| McGory 2005 [67]       | Non-cardiac surgery | RCTs, started BB preoperatively, evaluation $\geq 1$ relevant outcome                                     | Perioperative + long-term all-cause mortality | Any          | Placebo                    | 8         | 354            | 278       | 0.15               | HIGH            | 9/11                 |
| Mostafaie 2015 [68]    | Non-cardiac surgery | RCTs non-cardiac vascular surgery, initiated BB preoperatively                                            | All-cause mortality, CV mortality             | Any          | Placebo or no Tx           | 2         | 301            | 298       | 0.083              | LOW             | 11/11                |
| Sakamoto 2014 [69]     | Cardiac-surgery     | RCTs in Japanese patients                                                                                 | Post-operative AF                             | Landiolol    | Placebo, no Tx or other Tx | 6         | 302            | 258       | 0.019              | HIGH            | 9/11                 |
| Schouten 2005 [70]     | Non-cardiac surgery | RCTs reporting $\geq 1$ of perioperative MI and cardiac mortality                                         | Perioperative MI, cardiac mortality           | Any          | Placebo or no Tx           | 15        | 551            | 526       | 0.020              | HIGH            | 8/11                 |
| Talati 2009 [71]       | Non-cardiac surgery | RCTs in BB naïve patients initiated preoperatively                                                        | All-cause mortality, MI, stroke               | Any          | Placebo                    | 6         | 5094           | 5089      | 0.34               | LOW             | 7/11                 |
| Wang 2013 [72]         | Cardiac-surgery     | RCTs reporting post-operative AF                                                                          | Post-operative AF                             | Carvedilol   | Placebo, no Tx or other Tx | 2         | 111            | 102       | n/s                | LOW             | 6/11                 |
| Weisbauer 2007 [73]    | Any surgery         | RCTs, BB initiated pre/intraoperative or 1 day post surgery. Subgroup cardiac vs. non-cardiac surgery     | All-cause mortality, adverse effects          | Any          | Placebo or no Tx           | 21        | 2206           | 2198      | 0.083              | LOW             | 11/11                |
| Wijeysundara 2014 [74] | Non-cardiac surgery | RCTs or cohort studies $>100$ patients, BB started $\leq 45$ days prior to surgery or $\leq 24$ hrs post. | All-cause mortality, MI, CV mortality, stroke | Any          | Placebo or no Tx           | 16        | 5986           | 5977      | 0.26               | LOW             | 11/11                |



| INCLUDED STUDY                        | Population                   | Inclusion population definition                                                                                                   | Primary outcome                            | Beta-blocker | Control                    | Studies n | Beta-blocker n | Control n | Follow-up (years)* | ROBIS Bias Risk | AMSTAR Quality score |
|---------------------------------------|------------------------------|-----------------------------------------------------------------------------------------------------------------------------------|--------------------------------------------|--------------|----------------------------|-----------|----------------|-----------|--------------------|-----------------|----------------------|
| Zangrillo 2009 [75]                   | Cardiac-surgery              | RCTs, no restriction in dose and timing of BB.                                                                                    | Myocardial ischaemia; arrhythmias          | Esmolol      | Placebo or no Tx           | 20        | 386            | 392       | n/s                | HIGH            | 9/11                 |
| <i>Hypertension</i>                   |                              |                                                                                                                                   |                                            |              |                            |           |                |           |                    |                 |                      |
| Balamuthus amy 2009 [76]              | Diabetic with HTN            | RCTs in diabetic hypertension                                                                                                     | MI, stroke, CV mortality, total mortality. | Any          | Other Tx                   | 8         | 5072           | 5281      | 5.4                | HIGH            | 7/11                 |
| Bangalore 2007 [77]                   | HTN                          | Follow up $\geq$ 1 yr. RCTs with randomised comparisons of regimens based on BB v other agents                                    | New-onset DM                               | Any          | Placebo, no Tx or other Tx | 12        | n/s            | n/s       | 4                  | HIGH            | 5/11                 |
| Bangalore Cardio-protection 2008 [78] | HTN                          | RCTs. BB used as first-line treatment for HTN, f/u >1 year. Reported cardiovascular outcomes                                      | ACM, CV mortality, MI, Stroke, HF          | Any          | Placebo, no Tx or other Tx | 9         | 34096          | 34124     | 3.5                | LOW             | 7/11                 |
| Bangalore Prevention 2008 [79]        | HTN                          | RCTs, hypertension with cardiovascular RFs but no established HF. BB as first line monotherapy, f/u >1 yr. HF reported as outcome | New-onset HF.                              | Any          | Other Tx                   | 6         | 52,857         | 13,665    | 3.5                | LOW             | 8/11                 |
| Bradley 2006 [80]                     | HTN                          | RCTs with BB as first-line drug or monotherapy                                                                                    | All-cause mortality                        | Any          | Placebo or no Tx           | 4         | 9109           | 14504     | 5                  | HIGH            | 11/11                |
| Carlberg 2004 [81]                    | HTN                          | RCTs in primary hypertension, treatment with atenolol as monotherapy and first-line drug                                          | ACM, CV mortality                          | Atenolol     | Placebo or no Tx           | 8         | 2625           | 3767      | 4.6                | LOW             | 6/11                 |
| Cruickshank 2017[82]                  | HTN <60yrs                   | 4 meta-analyses investigating obesity, sympathetic hyperactivity and beta blockers                                                | Mortality, stroke, MI                      | Any          | Placebo or no Tx           | n/s       | n/s            | n/s       | n/s                | HIGH            | 3/11                 |
| De Lima Luiz 2014 [83]                | HTN with prior stroke or TIA | RCT, clinical outcomes                                                                                                            | Stroke recurrence                          | Atenolol     | Placebo or no Tx           | 2         | 1104           | 1089      | 3                  | LOW             | 11/11                |
| Ding 2012 [84]                        | HTN                          | RCT, f/u > 2 years, sample size of >100 patients                                                                                  | Non-fatal and fatal stroke                 | Any          | Other Tx                   | 5         | n/s            | n/s       | 3                  | LOW             | 5/11                 |
| Jeffers 2016 [85]                     | HTN with prior stroke or CAD | CCB vs other antihypertensive agents on cardiovascular outcomes                                                                   | Mortality, MI, stroke                      | Any          | Placebo or no Tx           | 3         | n/s            | n/s       | 3                  | LOW             | 8/11                 |

| INCLUDED STUDY       | Population               | Inclusion population definition                                                                                | Primary outcome                                            | Beta-blocker | Control                    | Studies n | Beta-blocker n | Control n | Follow-up (years)* | ROBIS Bias Risk | AMSTAR Quality score |
|----------------------|--------------------------|----------------------------------------------------------------------------------------------------------------|------------------------------------------------------------|--------------|----------------------------|-----------|----------------|-----------|--------------------|-----------------|----------------------|
| Khan 2006 [86]       | HTN                      | RCTs comparing BB as first line for HTN in preventing major cardiovascular outcomes. Subgroup >60yrs vs <60yrs | Composite of: Stroke (non-fatal); MI (non-fatal); CV death | Any          | Placebo                    | 2         | 7588           | 11826     | 3                  | HIGH            | 6/11                 |
| Kuyper 2014 [87]     | HTN                      | RCTs using BBs as first-line in hypertension. Subgroup: Atenolol                                               | ACM, Stroke, MI, composite CV outcomes                     | Atenolol     | Placebo or no Tx           | 4         | 11,025         | 16,408    | n/s                | HIGH            | 5/11                 |
| Law 2009 [88]        | HTN                      | RCT                                                                                                            | CHD, stroke                                                | Any          | Placebo                    |           | n/s            | n/s       | n/s                | HIGH            | 4/11                 |
| Lindholm 2005 [89]   | HTN                      | RCT of primary HTN, BB as first line antihypertensive in at least 50% of pts                                   | ACM, CV mortality                                          | Any          | Placebo or no Tx           | 7         | 11025          | 16408     | n/s                | LOW             | 4/11                 |
| Messerli 1998 [90]   | HTN >60yrs               | RCTs, Tx duration > least 1 year, used diuretics and/or BB as first-line. Elderly cohort >= 60 years           | Stroke + TIA), Stroke mortality, CV mortality, ACM.        | Any          | Placebo or no Tx           | 10        | 1521           | 2678      | n/s                | HIGH            | 4/11                 |
| Palla 2017 [91]      | HTN black patients       | RAS inhibitors vs other antihypertensive agents on cardiovascular outcomes                                     | Mortality, MI, stroke                                      | Any          | Placebo                    | 3         | 3376           | 3377      | 2                  | LOW             | 8/11                 |
| Psaty 1997 [92]      | HTN                      | RCTs, vascular disease, f/u >1 year                                                                            | Stroke, CHD, CHF, mortality                                | Any          | Placebo                    | 4         | 383            | 700       | 1.5                | LOW             | 8/11                 |
| Remonti 2016[93]     | HTN with type 2 diabetes | MA of RCTs of antihypertensive agents                                                                          | All-cause mortality                                        | Any          | Placebo or no Tx           | 30        | n/s            | n/s       | 3                  | LOW             | 9/11                 |
| Sciarretta 2011 [94] | HTN with high CV risk    | RCTs, high CV risk and >65% of pts with HTN, sample size >200. Reported absolute incidence                     | New onset HF                                               | Any          | Other Tx                   | 3         | 14564          | 14644     | 4.3                | LOW             | 8/11                 |
| Shinton 1990 [95]    | HTN                      | RCT, reported mortality, cerebrovascular and CHD events                                                        | All-cause mortality                                        | Any          | Placebo, no Tx or other Tx | 3         | 11858          | 11826     | n/s                | UNCLEAR         | 3/11                 |
| Venkata 2010 [96]    | HTN                      | RCT, subgroup atenolol vs non-atenolol                                                                         | Incident stroke                                            | Any          | Other Tx                   | 12        | 51963          | 53882     | n/s                | UNCLEAR         | 1/11                 |
| Wang 2016[97]        | HTN with prior stroke    | Bayesian network MA of antihypertensive agents on reducing stroke, CHD, MACCE                                  | Stroke                                                     | Any          | Placebo or no Tx           | 2         | 1104           | 1104      | 2.6                | LOW             | 6/11                 |
| Wysong 2012[98]      | HTN                      | RCT, Tx duration >1 year, BB as monotherapy or first-line drug                                                 | All-cause mortality                                        | Any          | Placebo                    | 4         | n/s            | n/s       | n/s                | LOW             | 11/11                |
| Wysong 2017[99]      | HTN                      | RCT, Tx duration >1 year, BB as monotherapy or first-line drug                                                 | All-cause mortality                                        | Any          | Placebo                    | 4         | n/s            | n/s       | n/s                | LOW             | 11/11                |

| INCLUDED STUDY    | Population | Inclusion population definition                                                                     | Primary outcome                                           | Beta-blocker | Control          | Studies n | Beta-blocker n | Control n | Follow-up (years)* | ROBIS Bias Risk | AMSTAR Quality score |
|-------------------|------------|-----------------------------------------------------------------------------------------------------|-----------------------------------------------------------|--------------|------------------|-----------|----------------|-----------|--------------------|-----------------|----------------------|
| Wright 1999 [100] | HTN        | RCT, Tx duration >1 year, defined endpoints, >70% in treatment group still taking drug after 1 year | ACM, stroke, CAD, Sudden cardiac death, total CV events   | Any          | Placebo or no Tx | 2         | 5505           | 10867     | n/s                | HIGH            | 6/11                 |
| Wright 2000 [101] | HTN        | RCT, BB or thiazides as first line therapy                                                          | All-cause mortality                                       | Any          | Placebo          | 2         | 5505           | 10867     | n/s                | UNCLEAR         | 2/11                 |
| Wright 2009 [102] | HTN        | RCTs, Tx duration >1 year, reported ITT analysis                                                    | ACM, stroke, CV events, withdrawal due to adverse effects | Any          | Placebo or no Tx | 5         | 6967           | 12346     | 4.5                | LOW             | 11/11                |
| Xue 2015 [103]    | HTN        | RCTs with parallel design, > 6 months f/u, primary hypertension, Reported morbidity or mortality    | ACM, MI, Stroke, HF hospitalisation, ESRF                 | Any          | Other Tx         | 2         | 4611           | 4628      | 4.8                | LOW             | 11/11                |

\*as provided or weighted calculation based on number of participants; ACM, all-cause mortality; AF, atrial fibrillation; AMSTAR, A Measurement Tool to Assess Systematic Reviews; BB, beta-blocker; CABG, coronary artery bypass graft; CKD, chronic kidney disease; CV, cardiovascular; ETT, exercise tolerance test; f/u, follow-up; HF, heart failure; LVEF, left ventricular ejection fraction; LVF, left ventricular failure; MI, myocardial infarction; n/s, not stated; NYHA, New York Heart Association; RCT, randomised controlled trial; ROBIS, Risk of Bias in Systematic Reviews; STEMI; ST elevation myocardial infarction; SVT, supraventricular tachycardia; Tx, treatment.

## **Supplemental Table 2: Details of excluded meta-analyses**

| <b>Excluded study</b>                 | <b>Inclusion population definition</b>                                                               | <b>Exclusion Reason</b>                                    | <b>Sample size</b>                                                                | <b>Results</b>                                                                                                                                         |
|---------------------------------------|------------------------------------------------------------------------------------------------------|------------------------------------------------------------|-----------------------------------------------------------------------------------|--------------------------------------------------------------------------------------------------------------------------------------------------------|
| <b><i>Coronary artery disease</i></b> |                                                                                                      |                                                            |                                                                                   |                                                                                                                                                        |
| Heidenreich 1999 [104]                | Randomised studies comparing BB, CCB and long acting nitrates.                                       | Did not compare BB vs placebo/no treatment                 | 90 RCTs involving 72 BB vs CCB and 6 BB vs nitrates                               | Cardiac mortality and MI were not significantly different between BB vs CCB. Fewer episodes of angina and adverse events with BB than CCB              |
| Howes 1995 [105]                      | Meta-analysis of atenolol, celiprolol, enalapril, nifedipine and doxazocin on cholesterol and BP     | Did not report clinical outcomes                           | 23 RCTs involving 15 on Atenolol and 5 on Celiprolol.                             | Atenolol reduced HDL-C and increased total cholesterol, LDL-C and triglycerides compared with others                                                   |
| Huang 2015 [106]                      | Meta-analysis of observational studies assessing beta-blockers in patients with MI undergoing PCI    | Observational studies included                             | 10 studies involving 40,873 patients                                              | Beta-blockers were associated with reduced mortality (adjusted HR .76, 95% CI 0.62-0.94) but not with CV mortality, recurrent MI or HF hospitalisation |
| Jia 2015 [107]                        | Meta-analysis of RCTs assessing Tongxinluo capsule vs BBs in patients with angina                    | No hard clinical outcomes reported                         | 73 RCTs including 7424 patients                                                   | Tongxinluo improved symptoms and ECG improvements significantly more than BBs                                                                          |
| Misumida 2015 [108]                   | Observational studies assessing beta-blockers in STEMI patients undergoing PCI with EF >40%          | Observational studies included                             | 7 observational studies involving 10,857 patients                                 | Beta-blockers were associated with reduced mortality HR 0.79, 95% CI 0.65-0.97                                                                         |
| Shu 2012 [109]                        | Diagnosed or suspected IHD. RCTs with parallel design, sub-grouped into placebo and no Tx comparison | Did not perform systematic search and formal meta-analysis | 2 studies (1 placebo, 1 no Tx).                                                   | All-cause mortality: no Tx comparison OR 0.40 95% CI 0.20-0.79; placebo comparison OR 0.92, 95% CI 0.62-1.38                                           |
| <b><i>Heart Failure</i></b>           |                                                                                                      |                                                            |                                                                                   |                                                                                                                                                        |
| <i>Briasoulis 2015 [110]</i>          | HFrEF patients. Compared carvedilol vs metoprolol                                                    | Did not compare BB vs placebo/no treatment                 | 10 studies. 30,943 on carvedilol and 69,925 on metoprolol. Follow up 36.4 months. | Mortality was reduced with carvedilol vs metoprolol in prospective studies only. No difference in hospitalisation                                      |
| <i>Chatterjee 2013 [111]</i>          | Compared different BB in HF patients                                                                 | Did not compare BB vs placebo/no treatment                 | 21 trials. 23,122 patients                                                        | No differences between BB in mortality                                                                                                                 |

| Excluded study                   | Inclusion population definition                                                               | Exclusion Reason                                                               | Sample size                                                                                 | Results                                                                                                                   |
|----------------------------------|-----------------------------------------------------------------------------------------------|--------------------------------------------------------------------------------|---------------------------------------------------------------------------------------------|---------------------------------------------------------------------------------------------------------------------------|
| <i>DiNicolantonio 2013 [112]</i> | Compared different BBs in setting of AMI or systolic HF                                       | Did not compare BB vs placebo/no treatment                                     | 8 trials of 4,563 patients                                                                  | In both AMI and HF trials, carvedilol significantly reduced mortality compared to placebo/ no treatment                   |
| <i>Dobre 2007 [113]</i>          | Systematic review of efficacy and tolerability of BB in elderly patients with HF              | Does not separate BB from other antihypertensive agents in a meta-analysis     | 3 trials                                                                                    | BB are well tolerate and effective in elderly HF patients                                                                 |
| <i>Leizorovicz 2002 [114]</i>    | Meta-analysis of RCTs comparing bisoprolol vs placebo                                         | Not a systematic approach to search                                            | 2 RCTs (CIBIS and CIBIS II) including 3288 patients                                         | Bisoprolol reduced mortality and hospitalisation compared to placebo                                                      |
| <i>Packer 2001 [115]</i>         | Meta-analysis of RCTs comparing carvedilol with metoprolol                                    | Did not report hard clinical end-points (only LVEF change). Compared BB vs BB. | 19 RCTs                                                                                     | Carvedilol increased LVEF more than metoprolol                                                                            |
| <i>Prins 2015 [116]</i>          | Meta-analysis of observational and randomised studies                                         | Compared BB withdrawal vs BB continuation                                      | 5 observational and 1 randomised study including 2,704 continued on BB and 439 discontinued | Discontinuation of BBs in acute decompensated HF significantly increased mortality and rehospitalisation                  |
| <i>Zaremski 1996 [117]</i>       | Meta-analysis of RCTs assessing BB versus placebo in dilated cardiomyopathy                   | Only reports NYHA class and LVEF change                                        | 11 RCTs including 623 patients                                                              | Low dose BB improved NYHA functional class and LVEF compared to placebo                                                   |
| <b>Perioperative</b>             |                                                                                               |                                                                                |                                                                                             |                                                                                                                           |
| <i>Crystal 2002 [118]</i>        | RCTs in CABG ± valve surgery. Reported SVT incidence                                          | Did not provide relevant clinical outcomes                                     | 27 trials                                                                                   | Reduced incidence of AF and SVT                                                                                           |
| <i>DiNicolantonio 2014 [119]</i> | Compared carvedilol vs metoprolol on incidence of AF in CABG                                  | Did not compare BB vs placebo/no treatment                                     | 4 trials of 601 patients.                                                                   | Carvedilol significantly reduced post-operative AF compared to metoprolol.                                                |
| <i>Kaw 2011 [120]</i>            | Meta-analysis of studies evaluating the association of new onset AF after CABG with mortality | Compared patients with AF vs non-AF (and not BB vs control)                    | 11 RCTs including 40,112 patients                                                           | Perioperative BB reduced occurrence of AF whereas ACEi increased it                                                       |
| <i>Ollila 2018[121]</i>          | Meta-analysis of RCTs evaluating intraperoperative BB use in non-cardiac surgery              | Not a meta-analysis of all-cause mortality: only 1 RCT included.               | 2 RCTs including 133 patients                                                               | Esmolol reduced myocardial ischaemia but had no significant evet on composite of cardiac events, hypotension or mortality |

| Excluded study       | Inclusion population definition                                                             | Exclusion Reason                                                           | Sample size                                            | Results                                                                                                                                                                      |
|----------------------|---------------------------------------------------------------------------------------------|----------------------------------------------------------------------------|--------------------------------------------------------|------------------------------------------------------------------------------------------------------------------------------------------------------------------------------|
| Yu 2011 [122]        | Non-cardiac surgery, esmolol v control, studies provide details on dose/infusion protocols. | Does not provide crude numbers so risk ratio outcome cannot be calculated. | 67 RCTs                                                | Esmolol reduced myocardial ischaemia (OR 0.17, 95% CI 0.02-0.45). Increased incidence of hypotension (dose related) but not bradycardia with esmolol                         |
| <b>Hypertension</b>  |                                                                                             |                                                                            |                                                        |                                                                                                                                                                              |
| Aursnes 2003 [123]   | Bayesian fixed effect model                                                                 | Included studies did not separate diuretic therapy from beta-blockers      | 27 trials                                              | BB or diuretics are similar to ACEi and CCB in stroke and HF prevention but superior to CCB in preventing coronary events                                                    |
| Baguet 2005 [124]    | Calculation of the sum weighted for trial size                                              | Did not report clinical outcomes                                           | 72 RCTs comprising 9,094 patients                      | SBP reduction more marked with diuretics, CCB and ACEi. Drug classes had a similar magnitude of effect on DBP                                                                |
| Baguet 2007 [125]    | Mean BP reduction for drug classes evaluated by combing data and weighting by trial size.   | Did not report clinical outcomes                                           | 80 RCTs involving 10,818 patients                      | Atenolol reduced SBP by 15.2mmHg and DBP by 12.1mmHg. Largest SBP reduction seen with CCB and ACEi whilst DBP were generally similar between classes but most marked with BB |
| Dahlof 2007 [126]    | RCT, first-line BB, Tx duration >1 year or >1000 patient years of f/u                       | Did not report crude data, only report HR for stroke.                      | 5 RCTs including 12537 subjects                        | Beta blocker based antihypertensive therapy reduced cardiovascular risk compared to placebo or no treatment                                                                  |
| Germino 2012 [127]   | Nebivolol vs placebo in 12 week RCT. Pooled changes in BP and heart rate and adverse events | Did not report clinical outcomes                                           | 3 RCTs involving 1380 on nebivolol and 205 on placebo. | Nebivolol significantly reduced both SBP and DBP compared to placebo, but with less efficacy in patients >62 years. Similar rates of adverse events between groups           |
| Marpillat 2013 [127] | Network meta-analysis of antihypertensive therapy on cognition                              | Only outcome reported is cognitive decline                                 | 19 RCTs (n = 18,515) and 11 studies (n = 831,674)      | BBs were less effective at reducing cognitive decline compared to ARBs, but not compared to CCBs, ACEi and diuretics                                                         |
| Magee 1999 [128]     | Meta-analysis of RCTs investigating BBs in pregnancy hypertension                           | Did not report relevant clinical outcomes                                  | 34 RCTs                                                | BBs were associated with an increase in small for gestational age, but decreased severe hypertension, proteinuria and respiratory distress syndrome                          |
| Mulrow 2009 [129]    | Cochrane review of RCTs of >1 year duration in hypertensive elders (≥60 years)              | Did not separate BBs from other antihypertensive therapies                 | 15 RCTs including 24,055 subjects                      | Antihypertensive therapy reduced mortality in those 60 years or older but not those 80 years or older                                                                        |
| Psaty 2003 [130]     | RCTs, f/u >1 year, network meta-analysis comparing to low dose diuretics only               | Not systematic BB vs control                                               | 42 RCTs including 192,478 subjects                     | Low dose diuretics were the most effective first line treatment to prevent cardiovascular morbidity and mortality.                                                           |

| Excluded study      | Inclusion population definition                                                       | Exclusion Reason                                     | Sample size                        | Results                                                                                                                   |
|---------------------|---------------------------------------------------------------------------------------|------------------------------------------------------|------------------------------------|---------------------------------------------------------------------------------------------------------------------------|
| Turnbull 2003[131]  | Meta-analysis of effects of different antihypertensive therapies on clinical outcomes | Did not separate diuretic therapy from beta-blockers | 29 RCTs including 162,341 patients | There were no differences in major cardiovascular events between ACEi, CCB or diuretics/BB, although ACEi reduced BP less |
| Turnbull 2005 [132] | Meta-analysis of BP lowering regimens in patients with and without diabetes           | Did not separate diuretic therapy from beta-blockers | 27 RCTs including 158,709 patients | Major CV events were reduced similarly in those with and without diabetes by ACEi, CCB, ARB and diuretics/BB              |

ACEi, angiotensin converting enzyme inhibitor; AF, atrial fibrillation; ARB, angiotensin receptor blocker; BB, beta blocker; AMI, acute myocardial infarction; BP, blood pressure; CABG, coronary artery bypass graft; CCB, calcium channel blocker; CI, confidence interval; CIBIS, Cardiac Insufficiency Bisoprolol Study; CV, cardiovascular; DBP, diastolic blood pressure; f/u, follow up; HDL, high density lipoprotein; HF, heart failure; HR, hazard ratio; LDL, low density lipoprotein; LVEF, left ventricular ejection fraction; MI, myocardial infarction; NYHA, New York Heart Association; OR, odds ratio; PCI, percutaneous coronary intervention; RCTs, randomised controlled trials; SBP, systolic blood pressure; STEMI, ST-elevation myocardial infarction; SVT, supraventricular tachycardia.

### **Supplemental Table 3: ROBIS results for each individual meta-analysis**

The ROBIS checklist tool was used to assess any concerns with the review process, including study eligibility criteria, identification and selection of studies, data collection and study appraisal, and synthesis of findings. The overall risk of bias is the interpretation of review findings, and whether these considered the limitations found in the domains above.

| Study                                 | Comment        | Study eligibility criteria | Identification and selection of studies | Data collection and study appraisal | Synthesis and findings | Risk of bias in the review |
|---------------------------------------|----------------|----------------------------|-----------------------------------------|-------------------------------------|------------------------|----------------------------|
| <b><i>Coronary Artery Disease</i></b> |                |                            |                                         |                                     |                        |                            |
| Al-Reesi 2008[6]                      |                | Low                        | Low                                     | Low                                 | Low                    | High                       |
| Bangalore 2014[7]                     |                | Low                        | Low                                     | Low                                 | Low                    | Low                        |
| Brandler 2010[8]                      |                | Low                        | Low                                     | Low                                 | High                   | Low                        |
| Chatterjee 2013[9]                    |                | Low                        | Low                                     | Low                                 | Low                    | Low                        |
| Elgendy 2016[10]                      |                | Low                        | Low                                     | High                                | Low                    | Low                        |
| Freemantle 1999[11]                   |                | Low                        | Low                                     | Low                                 | High                   | High                       |
| Houghton 2000[12]                     |                | Low                        | High                                    | High                                | High                   | Low                        |
| Huang HL 2012[13]                     |                | Low                        | Low                                     | High                                | High                   | High                       |
| Olsson 1992[14]                       |                | High                       | High                                    | Low                                 | High                   | High                       |
| Paladino 2010[15]                     |                | Low                        | Low                                     | High                                | High                   | Low                        |
| Perez 2009[16]                        | Registered     | Low                        | Low                                     | Low                                 | Low                    | Low                        |
| Shu 2012[109]                         |                | Low                        | High                                    | High                                | High                   | High                       |
| Soriano 1997[17]                      |                | Low                        | Low                                     | Low                                 | Low                    | High                       |
| <b><i>Heart Failure</i></b>           |                |                            |                                         |                                     |                        |                            |
| Abdulla 2006[18]                      |                | Low                        | Low                                     | High                                | Low                    | High                       |
| Al-Gobari 2013[19]                    |                | Low                        | High                                    | High                                | Low                    | Low                        |
| Azevum 1998[20]                       |                | Low                        | High                                    | Low                                 | Low                    | High                       |
| Badve 2011[21]                        |                | High                       | High                                    | High                                | Low                    | Low                        |
| Bavishi 2014[22]                      |                | Low                        | Low                                     | Low                                 | Low                    | Low                        |
| Bell 2006[23]                         |                | Low                        | High                                    | High                                | High                   | High                       |
| Bonet 2000[25]                        |                | Low                        | Low                                     | High                                | High                   | High                       |
| Bouzamondo 2003[26]                   |                | Low                        | High                                    | High                                | High                   | High                       |
| Burnett 2017[24]                      |                | Low                        | Low                                     | High                                | Low                    | Low                        |
| Brophy 2001[27]                       |                | Low                        | High                                    | High                                | Low                    | Low                        |
| Cleland 2018[28]                      | Registered IPD | Low                        | Low                                     | Low                                 | Low                    | Low                        |



|                              |                |      |      |      |      |         |
|------------------------------|----------------|------|------|------|------|---------|
| Cleophas 2001[29]            |                | Low  | High | High | High | Unclear |
| Dulin 2005[30]               |                | Low  | High | High | High | High    |
| Fauchier 2007[31]            |                | Low  | High | High | Low  | Low     |
| Fukuta 2016[32]              |                | Low  | Low  | High | Low  | Low     |
| Haas 2003[33]                |                | Low  | High | High | Low  | Low     |
| Heidenreich 1997[34]         |                | Low  | Low  | High | High | High    |
| Kotecha 2014[35]             | Registered IPD | Low  | Low  | Low  | Low  | Low     |
| Kotecha 2016[36]             | Registered IPD | Low  | Low  | Low  | Low  | Low     |
| Kotecha 2017[28]             | Registered IPD | Low  | Low  | Low  | Low  | Low     |
| Krum 2005[38]                |                | Low  | Low  | High | High | Low     |
| Lechat 1998[39]              |                | Low  | High | High | Low  | High    |
| Lee 2001[40]                 |                | Low  | High | High | Low  | High    |
| Liu 2014[41]                 |                | Low  | High | Low  | Low  | Low     |
| Martin 2018[42]              |                | Low  | Low  | Low  | Low  | Low     |
| McAlister 2009[43]           |                | Low  | Low  | Low  | Low  | Low     |
| Nasr 2006[44]                |                | Low  | Low  | Low  | Low  | Low     |
| O'Connor 2011[45]            |                | Low  | High | High | Low  | Low     |
| Rienstra 2013[46]            |                | Low  | Low  | Low  | Low  | Low     |
| Shekelle 2003[47]            |                | High | High | High | Low  | High    |
| Shibata 2001[48]             |                | High | Low  | High | High | High    |
| Van Veldhuisen<br>2013[46]   |                | High | High | High | High | High    |
| Wali 2011[50]                |                | Low  | Low  | Low  | Low  | High    |
| Whorlow 2000[51]             |                | Low  | High | High | High | Low     |
| Zaman 2017[52]               |                | Low  | Low  | High | Low  | Low     |
| <b><i>Perioperative</i></b>  |                |      |      |      |      |         |
| Angeli 2010[53] bias         |                | Low  | Low  | Low  | Low  | Low     |
| Angeli 2010[54]<br>mortality |                | High | High | High | High | Unclear |
| Arsenault 2013[55]           |                | Low  | Low  | Low  | Low  | Low     |
| Badgett 2010[56]             |                | Low  | High | High | Low  | Low     |
| Bangalore 2008[57]           |                | Low  | Low  | Low  | Low  | Low     |
| Biccard 2008[58]             |                | High | High | High | Low  | Low     |
| Blessberger 2014[59]         | Registered     | Low  | Low  | Low  | Low  | Low     |
| Bouri 2014[60]               |                | Low  | Low  | Low  | Low  | Low     |

|                                        |            |      |      |      |      |      |
|----------------------------------------|------------|------|------|------|------|------|
| Dai 2014[61]                           |            | Low  | Low  | Low  | Low  | High |
| Devereaux 2005[62]                     |            | Low  | Low  | Low  | Low  | Low  |
| Guay 2013[63]                          |            | Low  | Low  | Low  | Low  | High |
| Ji 2016[64]                            |            | Low  | Low  | Low  | Low  | High |
| Khan 2013[65]                          |            | Low  | Low  | Low  | Low  | High |
| Landoni 2010[66]                       |            | Low  | Low  | Low  | Low  | High |
| McGory 2005[67]                        |            | Low  | Low  | Low  | Low  | High |
| Mostafaie 2015[68]                     | Registered | Low  | Low  | Low  | Low  | Low  |
| Sakamoto 2014[69]                      |            | Low  | Low  | Low  | Low  | High |
| Schouten 2005[133]                     |            | Low  | Low  | Low  | High | High |
| Talati 2009[71]                        |            | Low  | Low  | High | Low  | Low  |
| Wang 2013[72]                          |            | Low  | Low  | Low  | Low  | Low  |
| Weisbauer 2007[73]                     |            | Low  | Low  | Low  | Low  | Low  |
| Wijeysundera 2014[74]                  |            | Low  | Low  | Low  | Low  | Low  |
| Zangrillo 2009[75]                     |            | Low  | Low  | Low  | Low  | High |
| <b><i>Hypertension</i></b>             |            |      |      |      |      |      |
| Balamuthusamy 2009[76]                 |            | Low  | Low  | Low  | Low  | High |
| Bangalore 2007[77]                     |            | Low  | High | High | Low  | High |
| Bangalore 2008[78]<br>Cardioprotection |            | Low  | Low  | High | Low  | Low  |
| Bangalore 2008[79]<br>Prevention       |            | Low  | Low  | Low  | Low  | Low  |
| Bradley 2006[80]                       |            | Low  | Low  | Low  | Low  | High |
| Carlberg 2004[81]                      |            | Low  | Low  | High | High | Low  |
| Cruickshank 2017[82]                   |            | Low  | High | High | High | High |
| De Lima Luiz 2014[83]                  | Registered | Low  | Low  | Low  | Low  | Low  |
| Ding 2012[84]                          |            | Low  | Low  | High | High | Low  |
| Jeffers 2016[85]                       |            | Low  | Low  | Low  | Low  | Low  |
| Khan 2006[86]                          |            | Low  | Low  | Low  | Low  | High |
| Kuyper 2014[87]                        |            | Low  | Low  | High | Low  | High |
| Law 2009[88]                           |            | Low  | Low  | Low  | Low  | High |
| Lindholm 2005[89]                      |            | Low  | Low  | High | High | Low  |
| Messerli 1998[90]                      |            | Low  | Low  | High | Low  | High |
| Palla 2017[91]                         |            | High | Low  | Low  | Low  | Low  |

|                     |            |      |         |         |         |         |
|---------------------|------------|------|---------|---------|---------|---------|
| Psaty 1997[92]      |            | Low  | High    | Low     | Low     | Low     |
| Remonti 2016[93]    |            | Low  | Low     | Low     | Low     | Low     |
| Sciarretta 2011[94] |            | Low  | Low     | Low     | Low     | Low     |
| Shinton 1990[95]    |            | Low  | High    | High    | High    | Unclear |
| Venkata 2010[96]    |            | Low  | Unclear | Unclear | Unclear | Unclear |
| Wang 2016[134]      |            | Low  | High    | Low     | Low     | Low     |
| Wiysonge 2012[98]   |            | Low  | Low     | Low     | Low     | Low     |
| Wiysonge 2017[99]   |            | Low  | Low     | Low     | Low     | Low     |
| Wright 1999[100]    |            | Low  | Low     | Low     | High    | High    |
| Wright 2000[101]    |            | High | High    | High    | High    | Unclear |
| Wright 2009[102]    | Registered | Low  | Low     | Low     | Low     | Low     |
| Xue 2015[103]       | Registered | Low  | Low     | Low     | Low     | Low     |

Registered indicates the review was prospectively registered with a publicly available database, for example in PROSPERO. For references see Supplement 2. IPD, individual patient-data meta-analysis.

## **Supplemental Table 4: GRADE Scale for Assessment of Certainty of Evidence**

The Grading of Recommendations, Assessment, Development and Evaluation (GRADE) approach tool was used to assess the certainty of evidence. It provides a structured and transparent evaluation of the importance of outcomes, using a comprehensive criteria for downgrading or upgrading the certainty of evidence based on five factors: risk of bias, inconsistency of results, indirectness of evidence, imprecision in effect estimates, and publication bias. The overall certainty of evidence is the combined rating of the quality of evidence across these factors.

| <b>Study</b>                                                                                                 | <b>Risk of bias</b> | <b>Inconsistency</b> | <b>Indirectness</b> | <b>Imprecision</b> | <b>Publication bias</b> | <b>Overall certainty of evidence</b> |
|--------------------------------------------------------------------------------------------------------------|---------------------|----------------------|---------------------|--------------------|-------------------------|--------------------------------------|
| <b><i>Coronary Artery Disease: Acute Coronary Syndrome (trials after routine reperfusion)</i></b>            |                     |                      |                     |                    |                         |                                      |
| All-cause mortality                                                                                          | Not serious         | Serious              | Not serious         | Not serious        | None                    | Moderate                             |
| Incident myocardial infarction                                                                               | Not serious         | Not serious          | Not serious         | Not serious        | None                    | High                                 |
| Incident stroke                                                                                              | Not serious         | Not serious          | Not serious         | Very serious       | None                    | Low                                  |
| Incident heart failure                                                                                       | Not serious         | Not serious          | Not serious         | Serious            | None                    | Moderate                             |
| <b><i>Coronary Artery Disease: Acute Coronary Syndrome (trials before routine reperfusion)</i></b>           |                     |                      |                     |                    |                         |                                      |
| All-cause mortality                                                                                          | Not serious         | Serious              | Not serious         | Not serious        | None                    | Moderate                             |
| Incident myocardial infarction                                                                               | Not serious         | Not serious          | Not serious         | Not serious        | None                    | High                                 |
| Incident stroke                                                                                              | Not serious         | Not serious          | Not serious         | Very serious       | None                    | Low                                  |
| Incident heart failure                                                                                       | Not serious         | Not serious          | Not serious         | Serious            | None                    | Moderate                             |
| <b><i>Coronary Artery Disease: Non-acute ischaemic heart disease (trials after routine reperfusion)</i></b>  |                     |                      |                     |                    |                         |                                      |
| All-cause mortality                                                                                          | Not serious         | Serious              | Not serious         | Very serious       | None                    | Very low                             |
| Incident myocardial infarction                                                                               | Not serious         | Serious              | Not serious         | Very serious       | None                    | Very low                             |
| Incident stroke                                                                                              | Not serious         | Not serious          | Not serious         | Very serious       | None                    | Low                                  |
| Incident heart failure                                                                                       | Not serious         | Not serious          | Not serious         | Not serious        | None                    | High                                 |
| <b><i>Coronary Artery Disease: Non-acute ischaemic heart disease (trials before routine reperfusion)</i></b> |                     |                      |                     |                    |                         |                                      |
| All-cause mortality                                                                                          | Not serious         | Not serious          | Not serious         | Not serious        | None                    | High                                 |
| Incident myocardial infarction                                                                               | Not serious         | Not serious          | Not serious         | Not serious        | None                    | High                                 |
| Incident stroke                                                                                              | Not serious         | Not serious          | Not serious         | Very serious       | None                    | Low                                  |
| Incident heart failure                                                                                       | Not serious         | Not serious          | Not serious         | Serious            | None                    | Moderate                             |
| <b><i>Heart failure with LVEF &lt; 40%, in sinus rhythm</i></b>                                              |                     |                      |                     |                    |                         |                                      |
| All-cause mortality                                                                                          | Not serious         | Not serious          | Not serious         | Not serious        | None                    | High                                 |
| Cardiovascular mortality                                                                                     | Not serious         | Not serious          | Not serious         | Not serious        | None                    | High                                 |

|                                                                             |              |             |              |              |      |          |
|-----------------------------------------------------------------------------|--------------|-------------|--------------|--------------|------|----------|
| Heart failure hospitalisation                                               | Not serious  | Not serious | Not serious  | Not serious  | None | High     |
| Incident stroke                                                             | Not serious  | Not serious | Not serious  | Very serious | None | Low      |
| <b><i>Heart failure with LVEF &lt; 40%, in atrial fibrillation</i></b>      |              |             |              |              |      |          |
| All-cause mortality                                                         | Not serious  | Not serious | Not serious  | Not serious  | None | High     |
| Cardiovascular mortality                                                    | Not serious  | Not serious | Not serious  | Not serious  | None | High     |
| Heart failure hospitalisation                                               | Not serious  | Not serious | Not serious  | Not serious  | None | High     |
| Incident stroke                                                             | Not serious  | Not serious | Not serious  | Very serious | None | Low      |
| <b><i>Heart failure with LVEF ≥ 40%</i></b>                                 |              |             |              |              |      |          |
| All-cause mortality                                                         | Not serious  | Serious     | Not serious  | Serious      | None | Moderate |
| Cardiovascular mortality                                                    | Not serious  | Serious     | Not serious  | Serious      | None | Low      |
| Heart failure hospitalisation                                               | Not serious  | Serious     | Not serious  | Serious      | None | Low      |
| <b><i>Perioperative: Non-cardiac surgery (high risk of bias trials)</i></b> |              |             |              |              |      |          |
| All-cause mortality                                                         | Very serious | Not serious | Very serious | Serious      | High | Very low |
| Incident myocardial infarction                                              | Very serious | Not serious | Very serious | Not serious  | High | Very low |
| Incident stroke                                                             | Very serious | Serious     | Serious      | Very serious | High | Very low |
| <b><i>Perioperative: Non-cardiac surgery (low risk of bias trials)</i></b>  |              |             |              |              |      |          |
| All-cause mortality                                                         | Not serious  | Not serious | Not serious  | Serious      | None | Moderate |
| Incident myocardial infarction                                              | Not serious  | Not serious | Not serious  | Not serious  | None | High     |
| Incident stroke                                                             | Not serious  | Not serious | Not serious  | Not serious  | None | High     |
| <b><i>Perioperative: Cardiac surgery</i></b>                                |              |             |              |              |      |          |
| All-cause mortality                                                         | Not serious  | Not serious | Not serious  | Very serious | None | Low      |
| Incident myocardial infarction                                              | Not serious  | Not serious | Not serious  | Very serious | None | Low      |
| Incident stroke                                                             | Not serious  | Not serious | Not serious  | Very serious | None | Low      |
| <b><i>Hypertension: Beta-blocker vs placebo</i></b>                         |              |             |              |              |      |          |
| All-cause mortality                                                         | Not serious  | Not serious | Not serious  | Serious      | None | Moderate |
| Incident myocardial infarction                                              | Not serious  | Not serious | Not serious  | Serious      | None | Moderate |
| Incident stroke                                                             | Not serious  | Serious     | Not serious  | Serious      | None | Low      |
| <b><i>Hypertension: Beta-blocker vs Diuretic</i></b>                        |              |             |              |              |      |          |
| All-cause mortality                                                         | Not serious  | Not serious | Not serious  | Serious      | None | Moderate |

|                                                                                 |             |             |             |              |      |          |
|---------------------------------------------------------------------------------|-------------|-------------|-------------|--------------|------|----------|
| Incident myocardial infarction                                                  | Not serious | Not serious | Not serious | Very serious | None | Low      |
| Incident stroke                                                                 | Not serious | Not serious | Not serious | Very serious | None | Low      |
| <b><i>Hypertension: Beta-blocker vs Renin angiotensin system antagonist</i></b> |             |             |             |              |      |          |
| All-cause mortality                                                             | Not serious | Not serious | Not serious | Serious      | None | Moderate |
| Incident myocardial infarction                                                  | Not serious | Not serious | Not serious | Not serious  | None | High     |
| Incident stroke                                                                 | Not serious | Not serious | Not serious | Not serious  | None | High     |
| <b><i>Hypertension: Beta-blocker vs Calcium channel blocker</i></b>             |             |             |             |              |      |          |
| All-cause mortality                                                             | Not serious | Not serious | Not serious | Serious      | None | Moderate |
| Incident myocardial infarction                                                  | Not serious | Not serious | Not serious | Not serious  | None | High     |
| Incident stroke                                                                 | Not serious | Not serious | Not serious | Not serious  | None | High     |

Risk of bias was considered serious if the risk reduces confidence in the estimated treatment effect. Risk of bias was considered very serious if the risk is sufficiently large that the confidence in the estimated treatment effect is considerably lower. Inconsistency was considered serious if analyses do not share a consistent treatment effect. Inconsistency was considered very serious if analyses had dissimilar point estimates, non-overlapping confidence intervals, and significant heterogeneity. Indirectness was considered serious if cumulative evidence was derived from trials assessing interventions in participants with varying baseline cardiovascular risk. Indirectness was considered very serious if cumulative evidence was derived from trials assessing interventions in participants with wide variety of sub-indications. Serious imprecision was considered if the 95% confidence intervals overlaps with the minimally important difference for clinical benefit (RR >1.10). Very serious imprecision was considered if the 95% confidence intervals include both clinically important benefit (RR <0.90) and harm (RR >1.10).

**Supplemental Figure 1. PRISMA flow diagram**

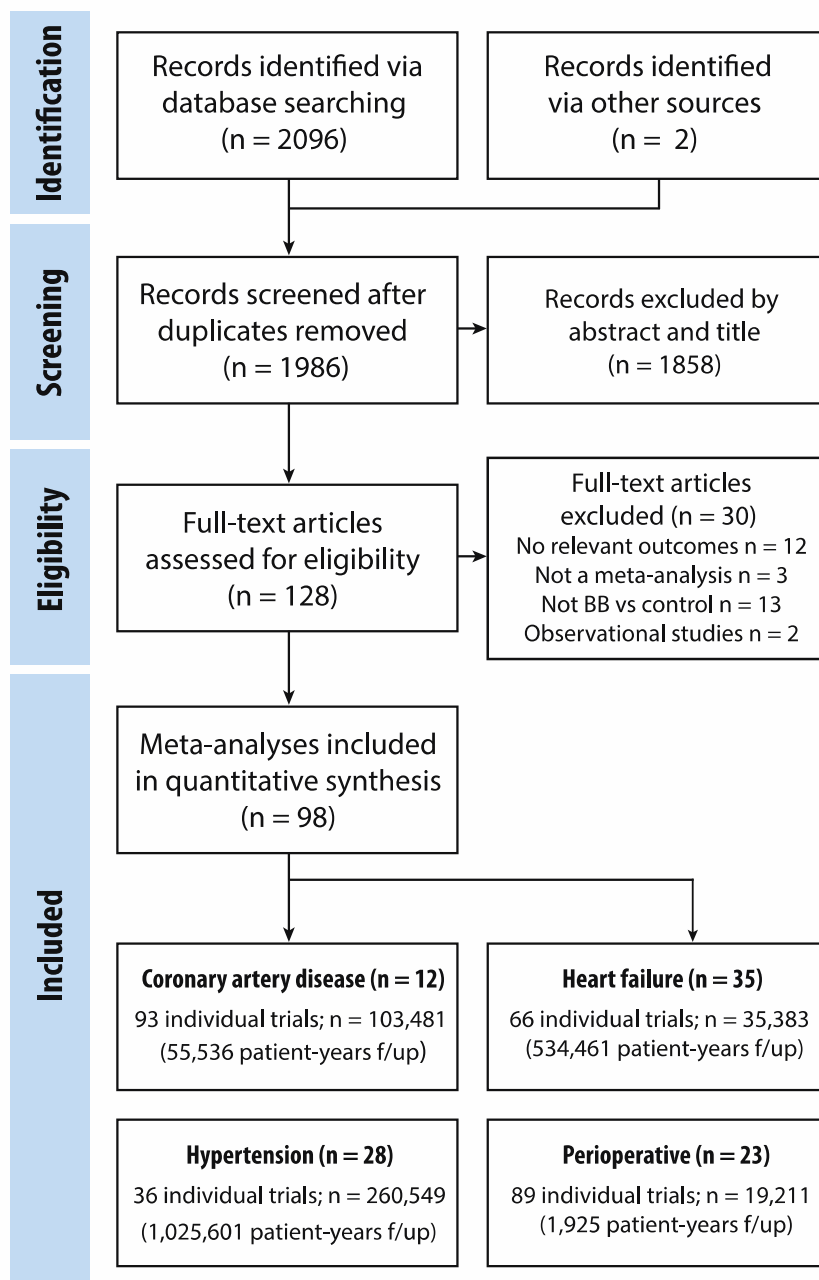

Numbers (n) reflect the number of included or excluded meta-analyses in our systematic review. BB, beta-blocker; f/up, follow-up.

**Supplemental Figure 2. ROBIS results from meta-analyses in each cardiovascular condition**

**condition**

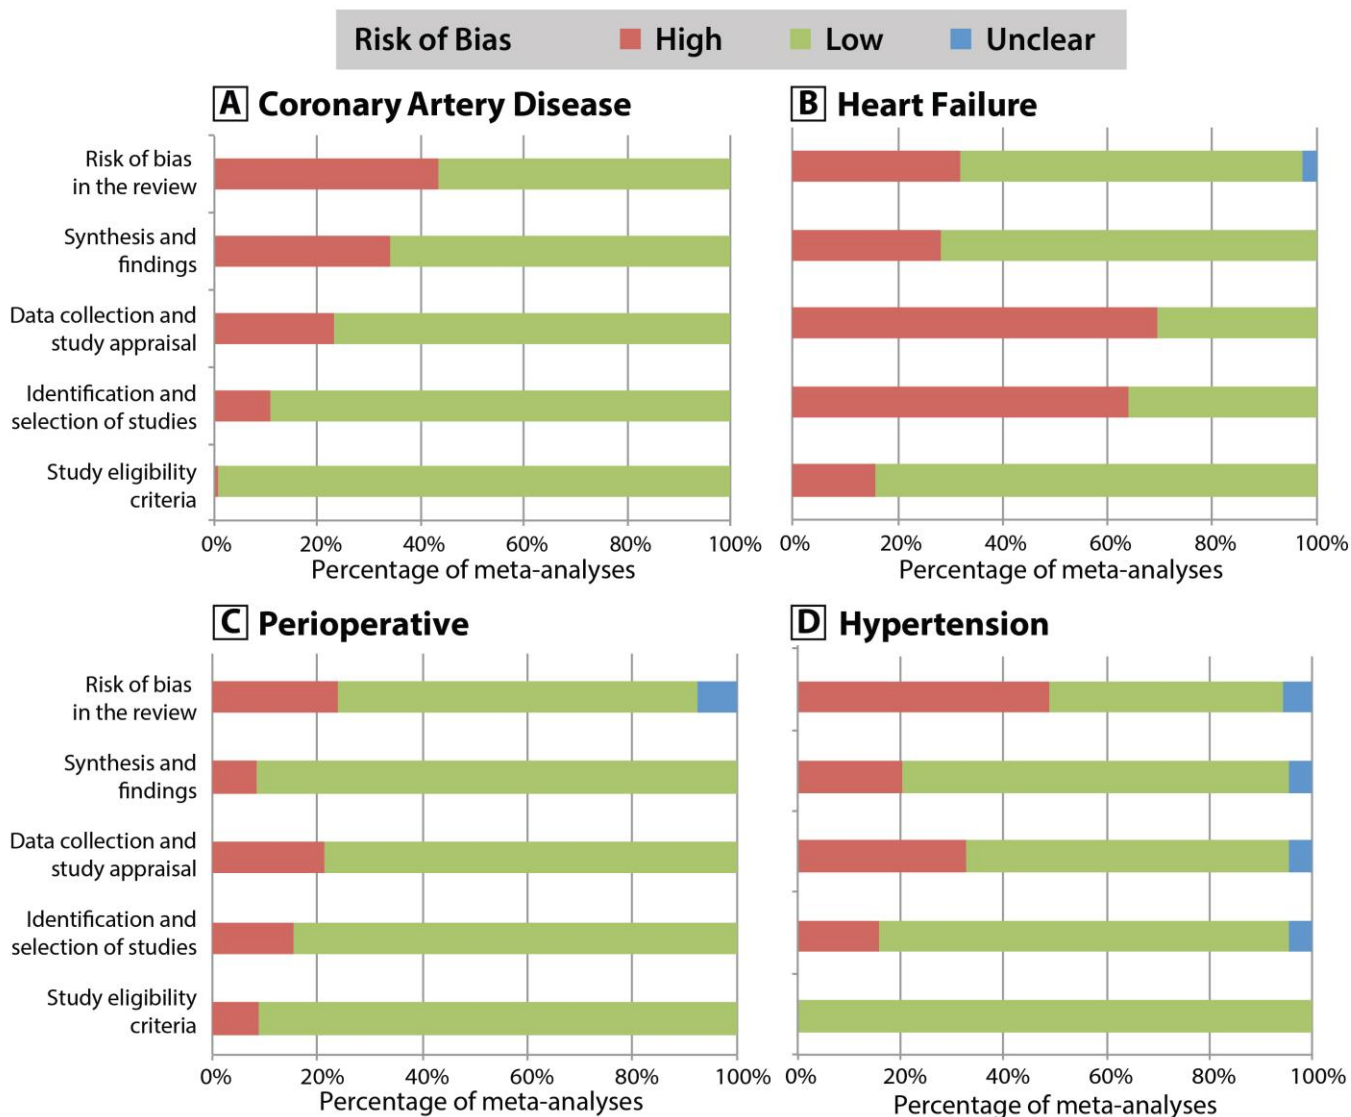

Graphical presentation of the ROBIS (Risk Of Bias In Systematic review) checklist results from all included meta-analyses categorised into each cardiovascular condition. Red colour represents high risk of bias, green represents low risk of bias, and blue represents unclear bias risk. The “risk of bias in review” category indicates the overall risk of bias rating.



# Supplemental Figure 3: Coronary artery disease meta-analyses

## A Population: Coronary artery disease meta-analyses Outcome: All-cause mortality

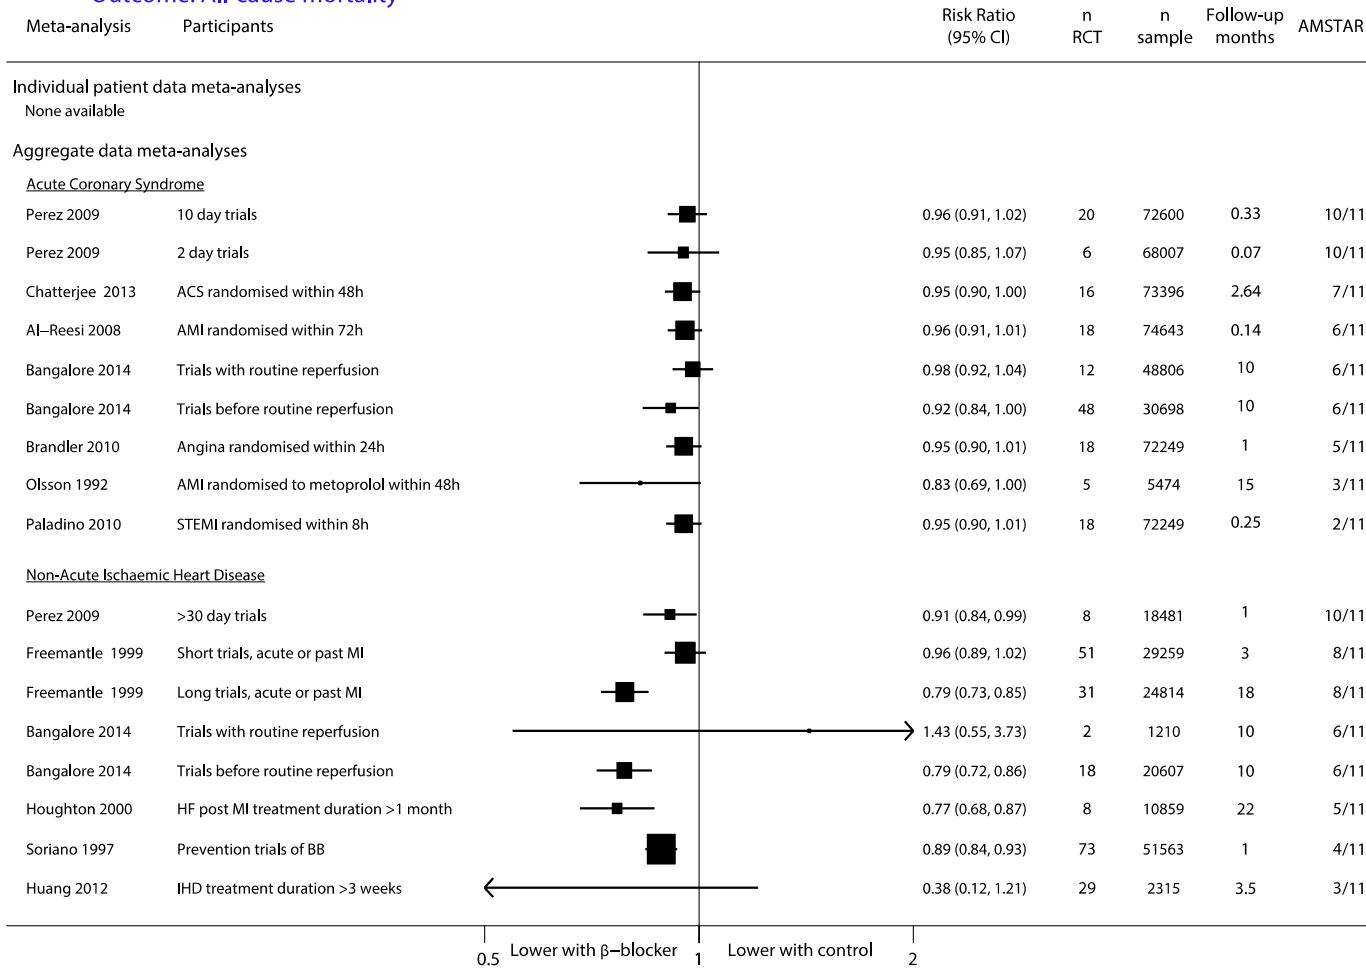

## B Outcome: Myocardial infarction

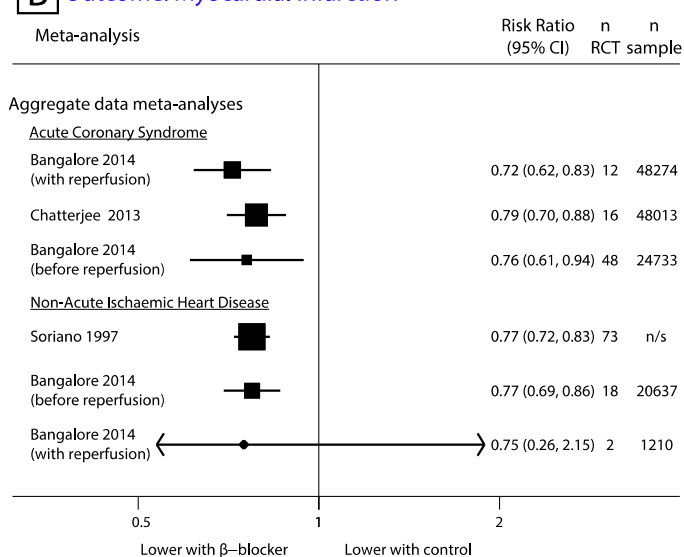

## C Outcome: Heart failure

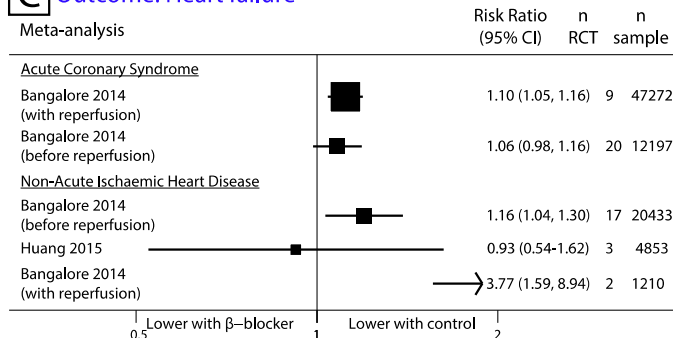

## D Outcome: Stroke

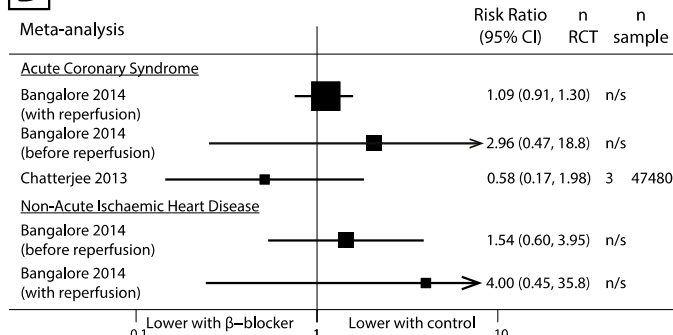

Summary plots of meta-analyses for coronary artery disease, including A) all-cause mortality; B) myocardial infarction; and C) heart failure; ordered by study quality using the AMSTAR index.

# Supplement Figure 4: Heart failure meta-analyses

## A Population: Heart failure meta-analyses Outcome: All-cause mortality

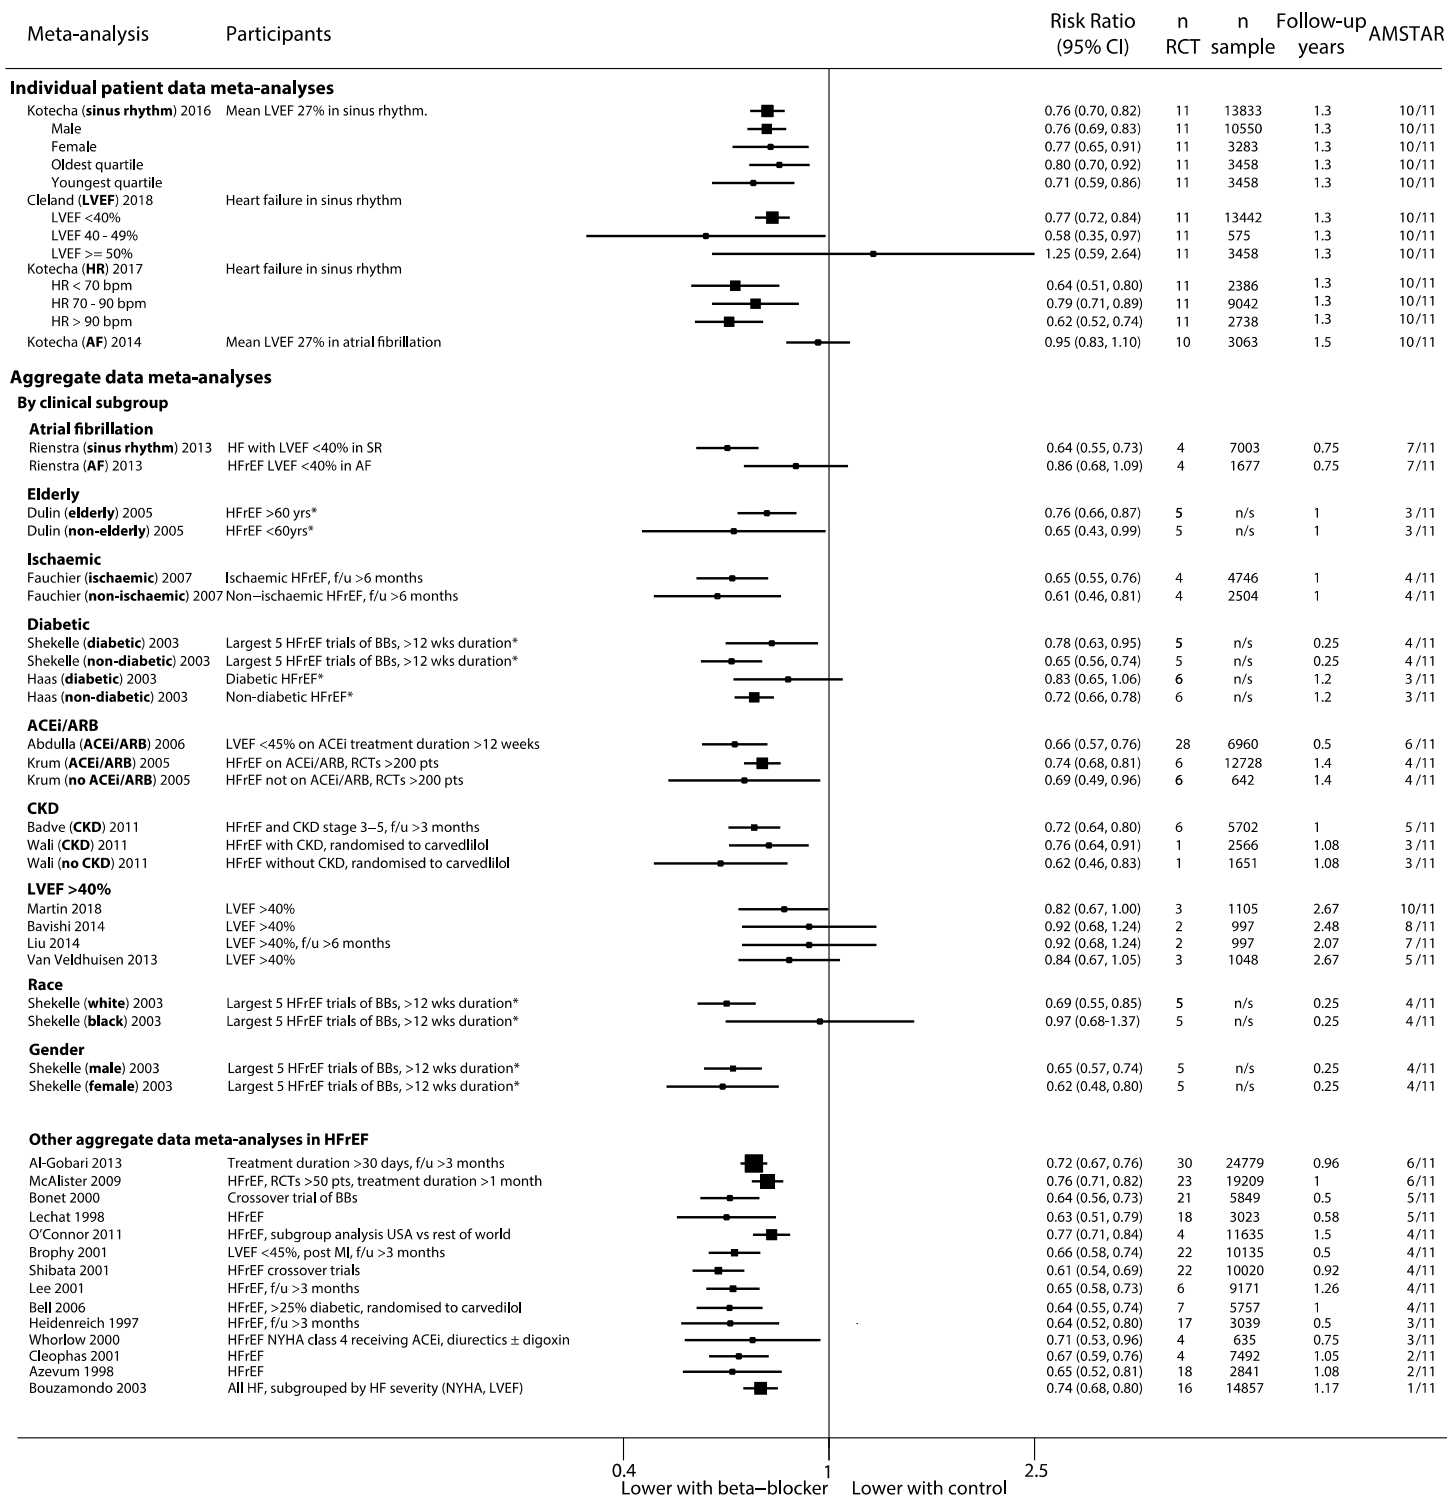

## Population: Heart failure meta-analyses

### B Outcome: Cardiovascular mortality

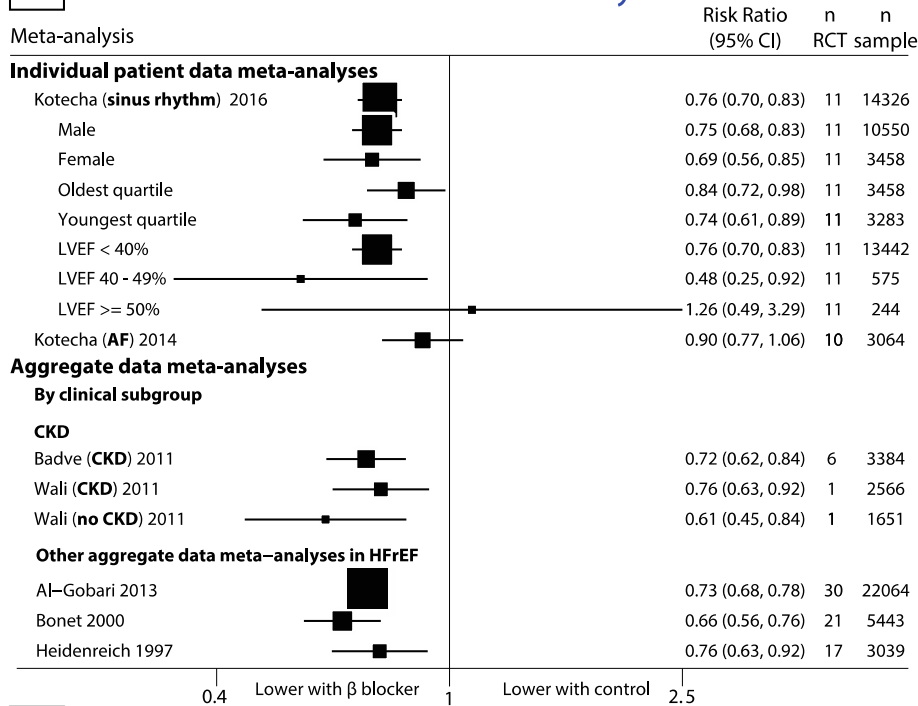

### C Outcome: Heart failure hospitalisation

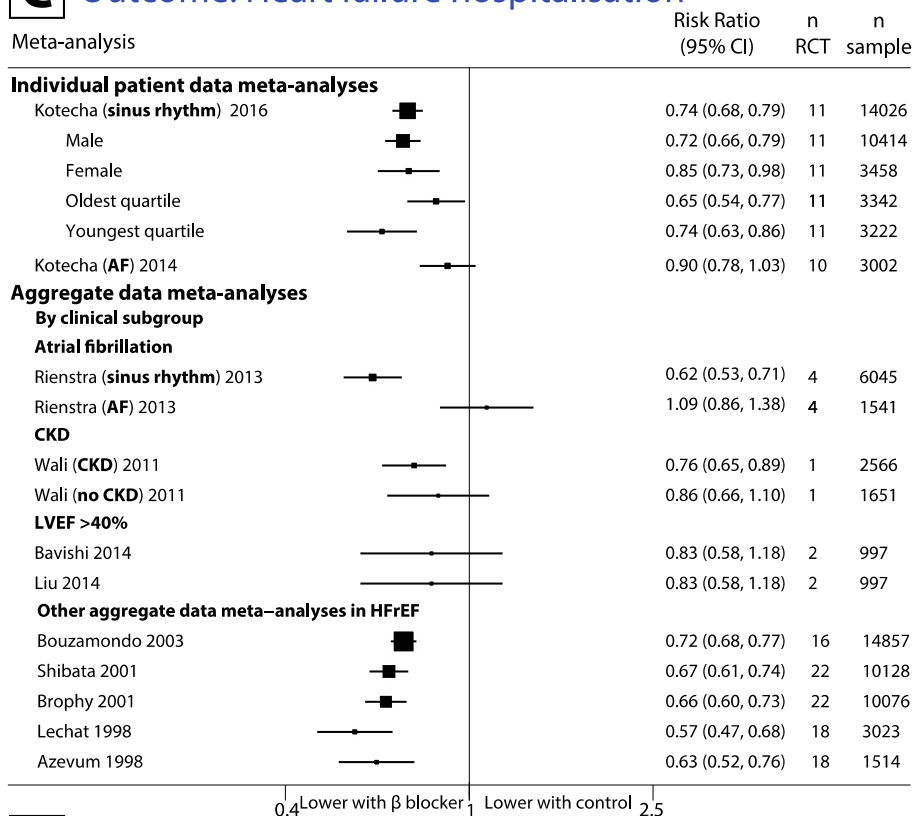

### D Outcome: Non fatal stroke

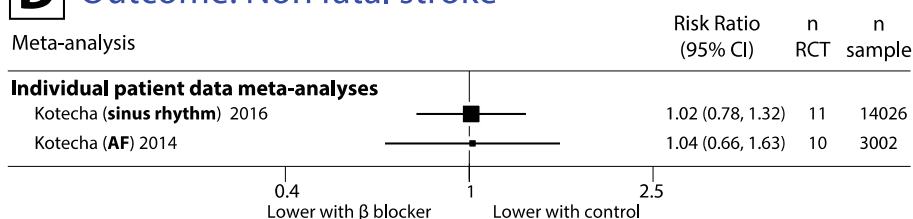

Summary of meta-analyses for heart failure reporting A) all-cause mortality; B) cardiovascular mortality; C) heart failure hospitalisation; and D) non-fatal stroke; ordered by AMSTAR. \* adjusted outcome.

# Supplemental Figure 5: Perioperative risk reduction meta-analyses

## A Population: Perioperative meta-analyses Outcome: All-cause mortality

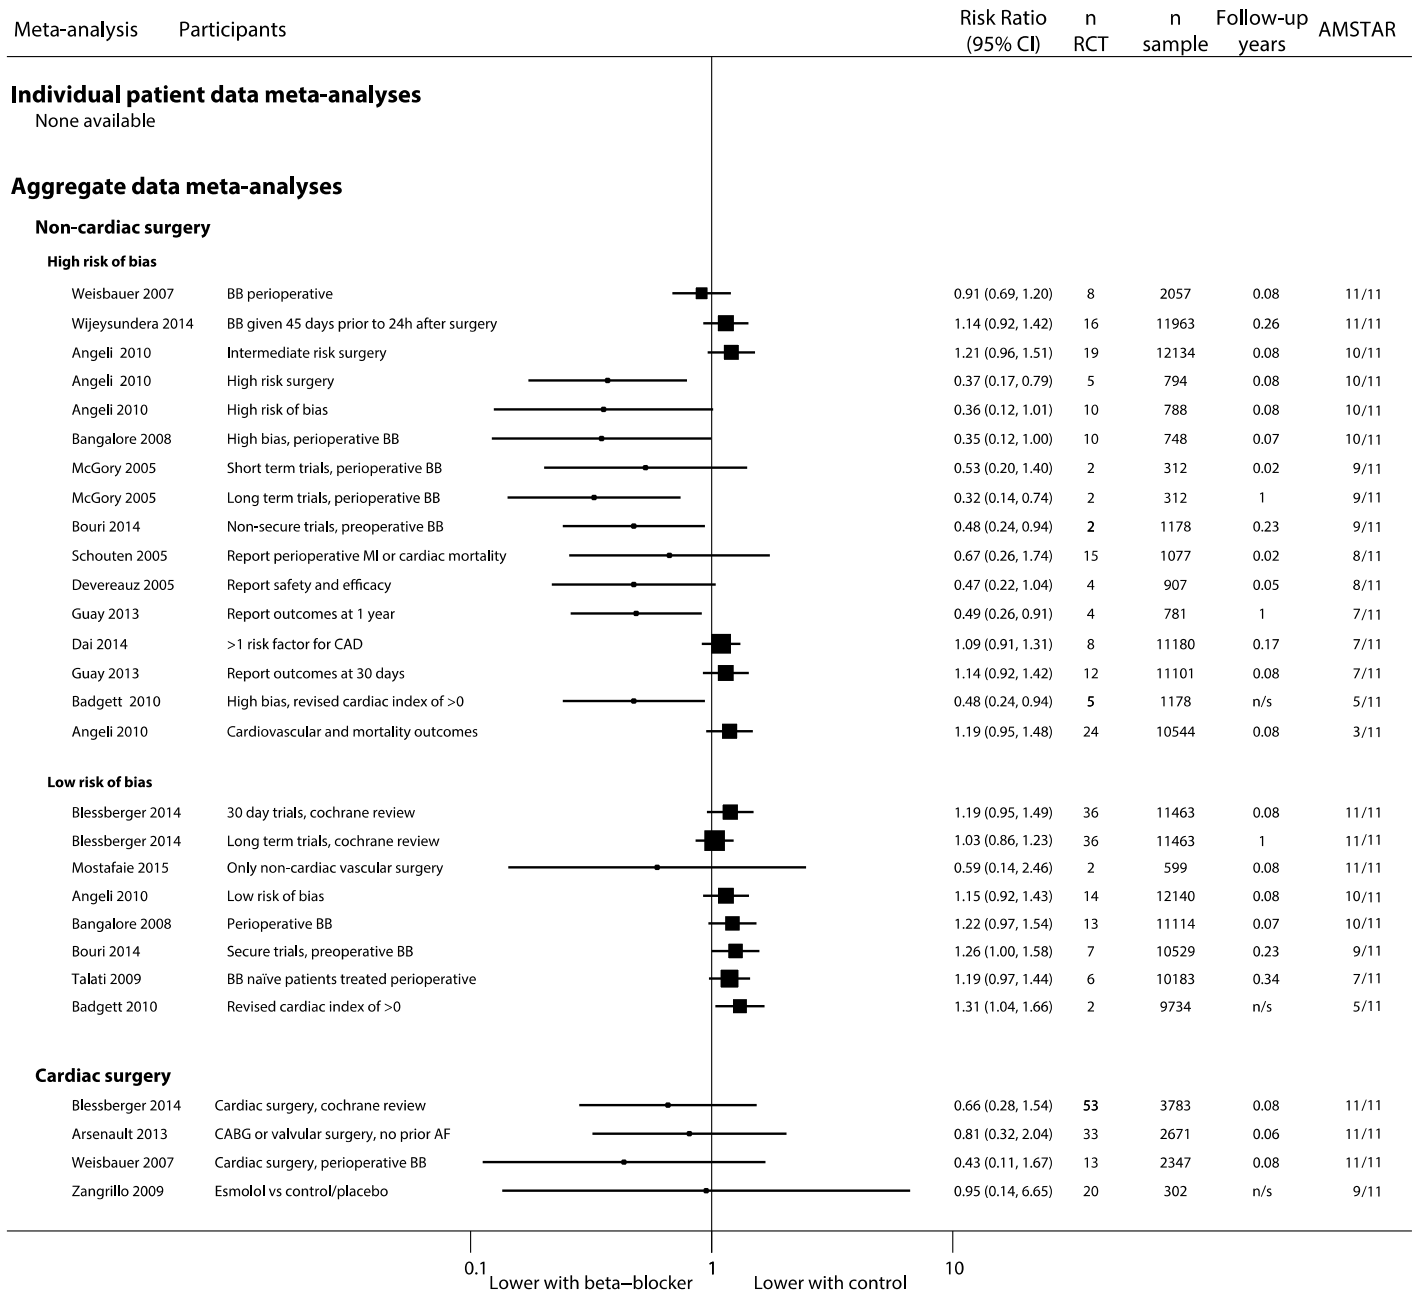

## B Population: Perioperative meta-analyses Outcome: Myocardial infarction

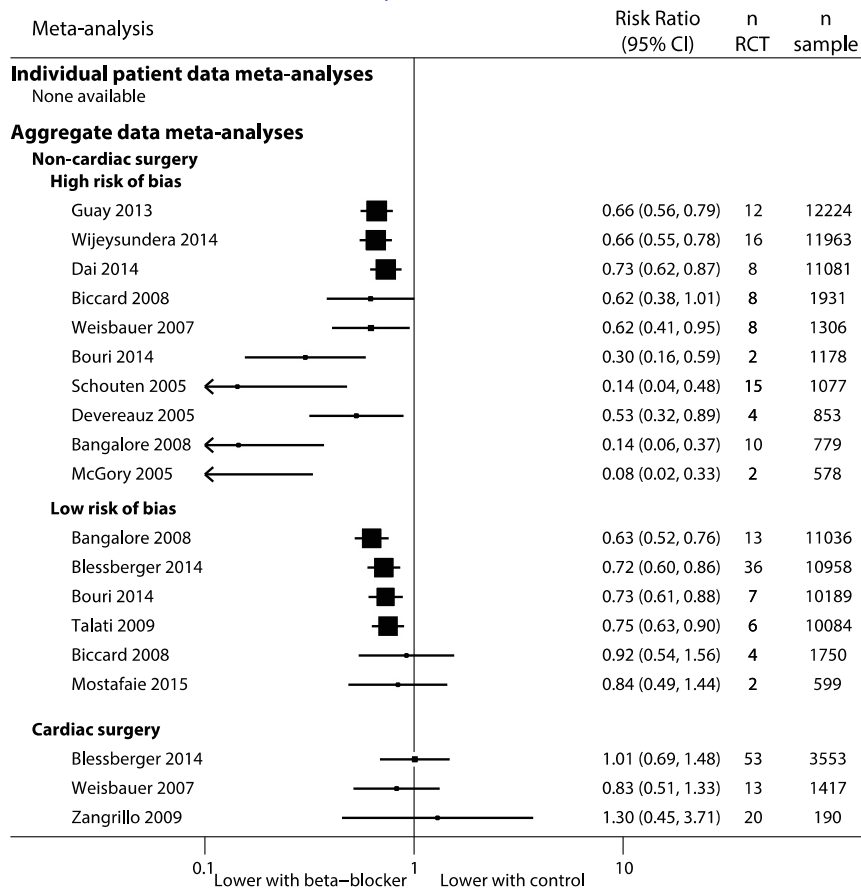

## C Population: Perioperative meta-analyses Outcome: Stroke

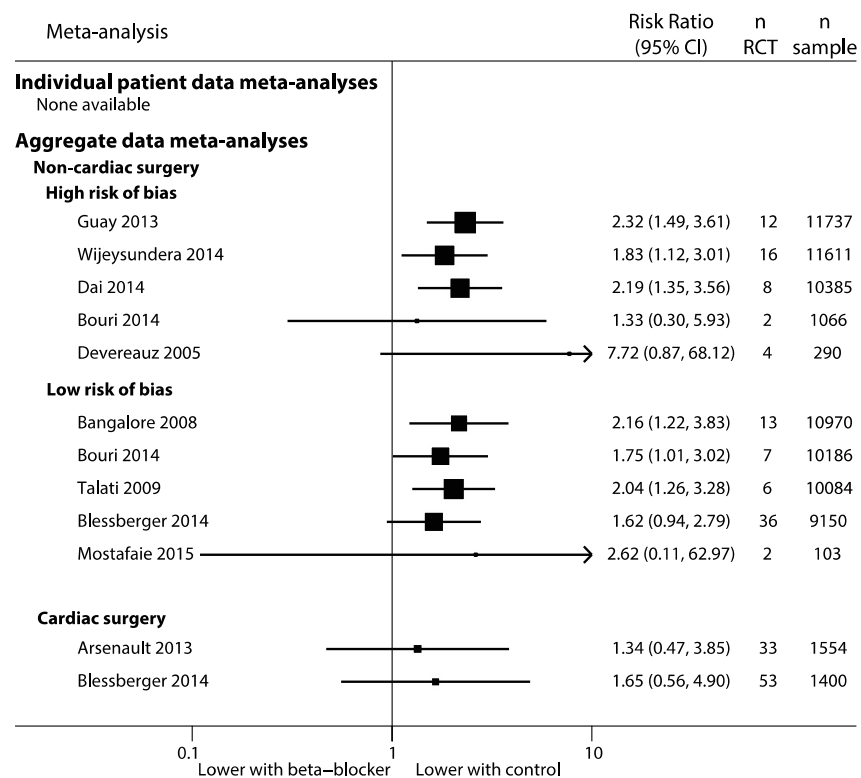

Summary plots of meta-analyses for perioperative risk reduction, including A) all-cause mortality; B) myocardial infarction; and C) stroke; ordered by study quality using AMSTAR index.

# Supplementy Figure 6: Hypertension meta-analyses

## A Population: Hypertension meta-analyses Outcome: All-cause mortality

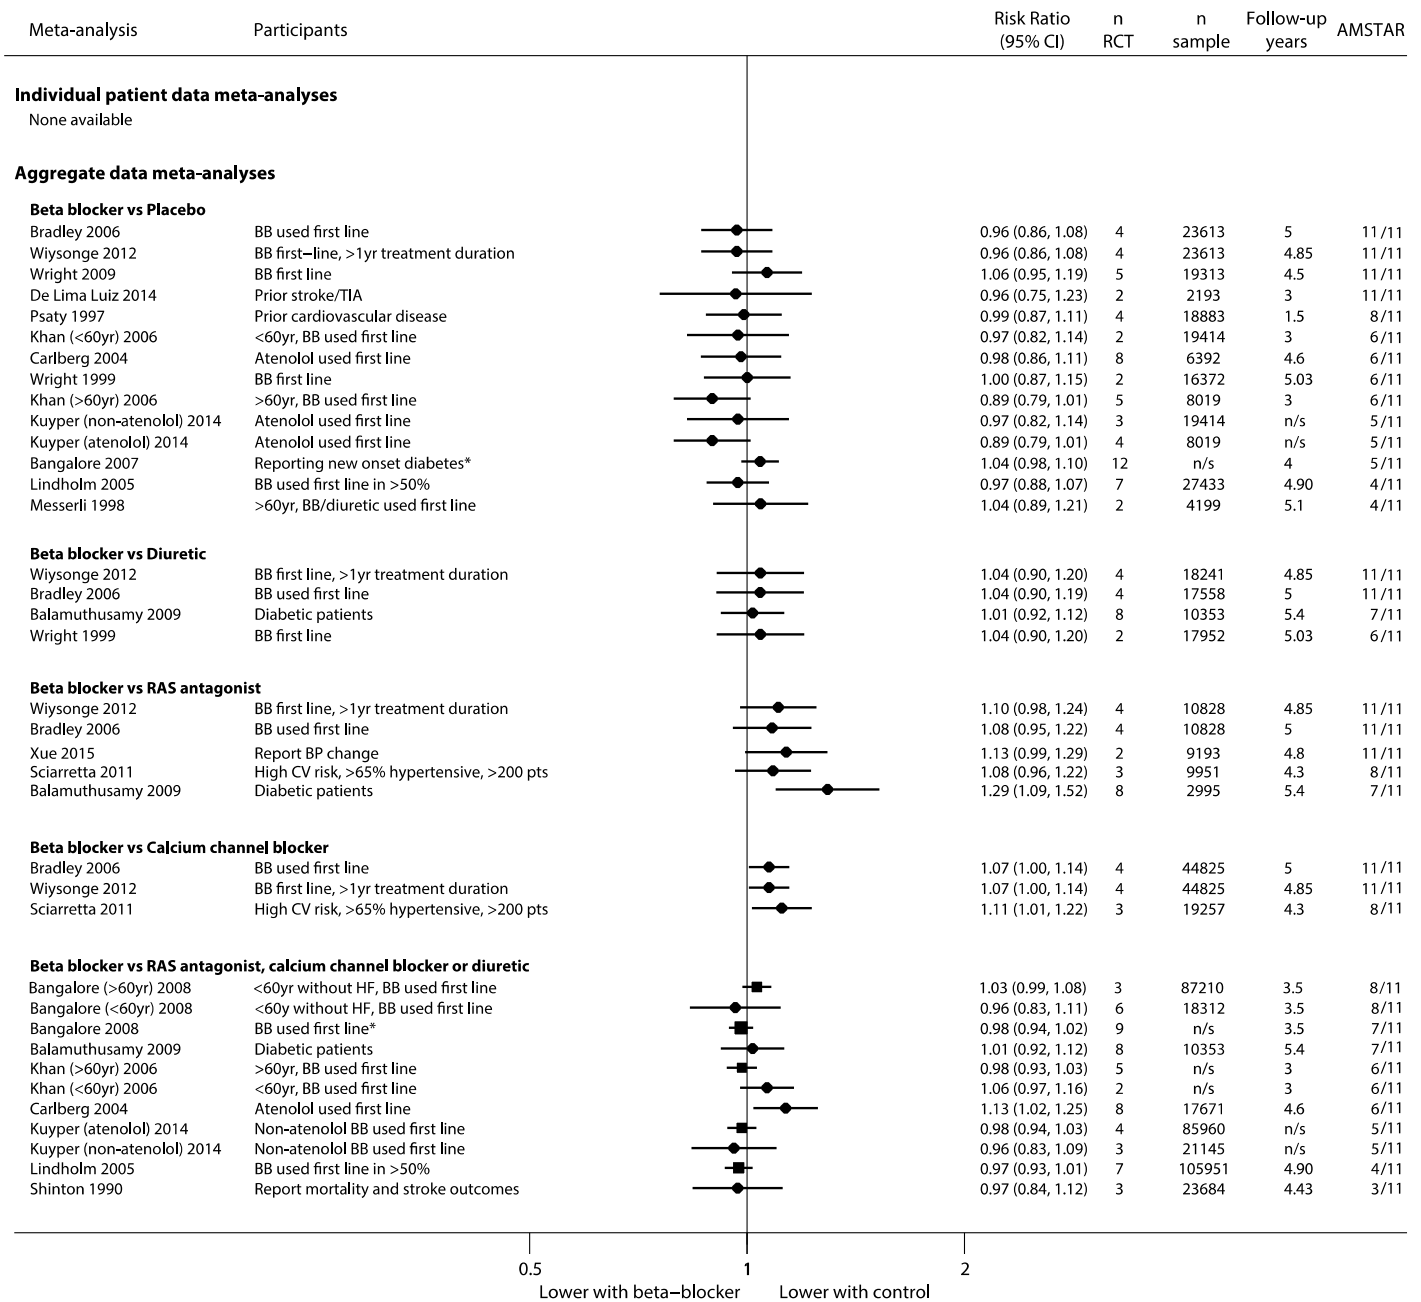

## B Population: Hypertension meta-analyses

### Outcome: Myocardial infarction

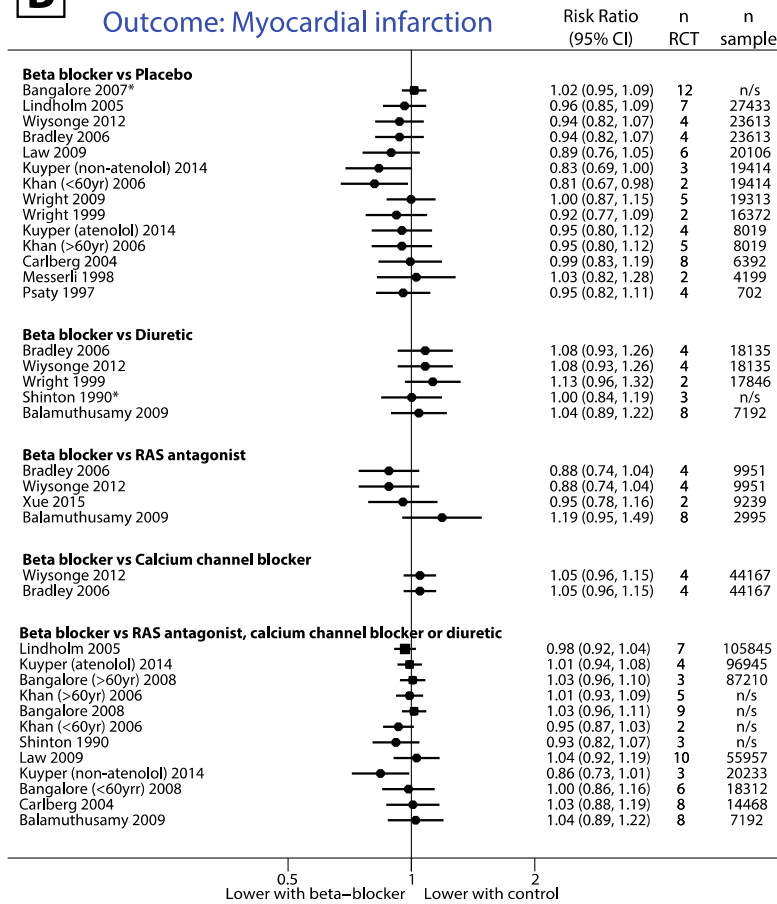

## C Population: Hypertension meta-analyses

### Outcome: Stroke

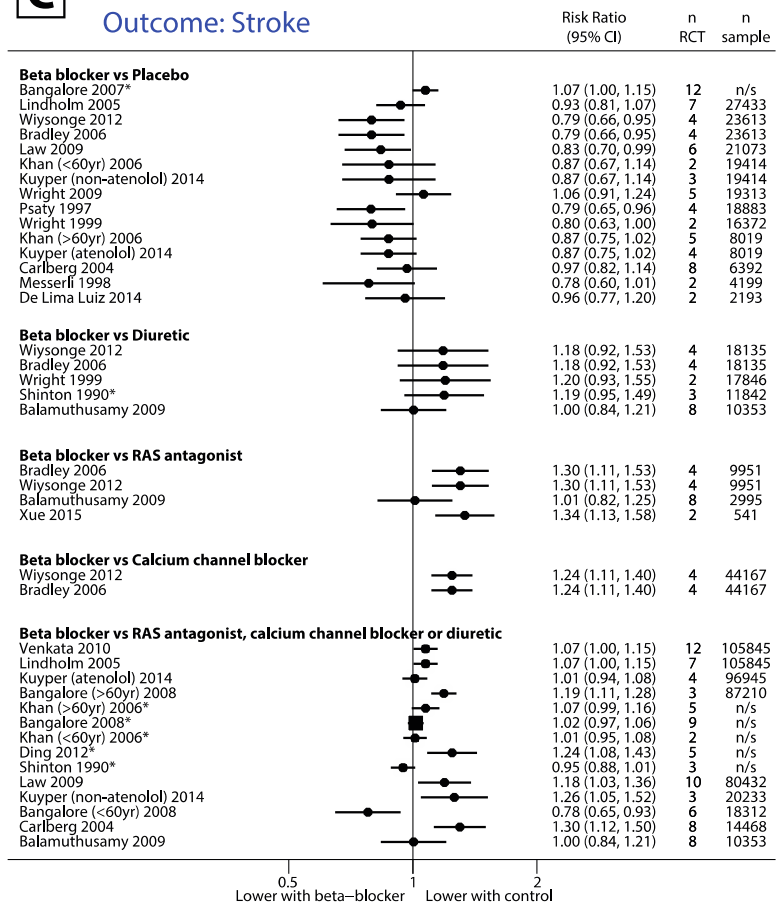

Summary plots of meta-analyses for hypertension reporting A) all-cause mortality; B) myocardial infarction; and C) stroke; ordered by study quality using the AMSTAR index. \* adjusted outcome.

## Supplemental Figure 7: Hypertension meta-analyses according to beta-blocker type

**A** Population: Hypertension meta-analyses  
Outcome: All-cause mortality

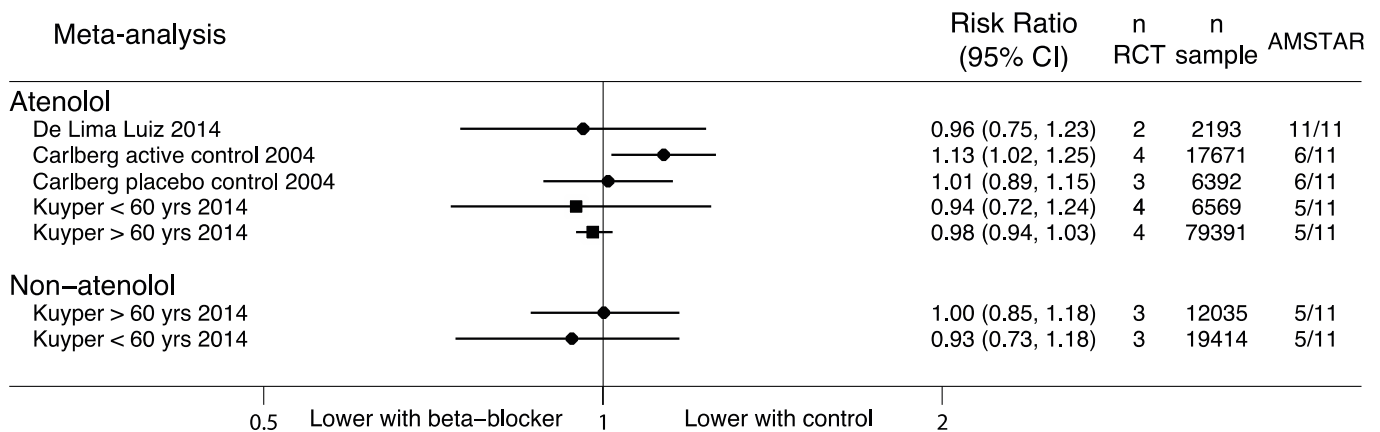

**B** Population: Hypertension meta-analyses  
Outcome: Myocardial infarction

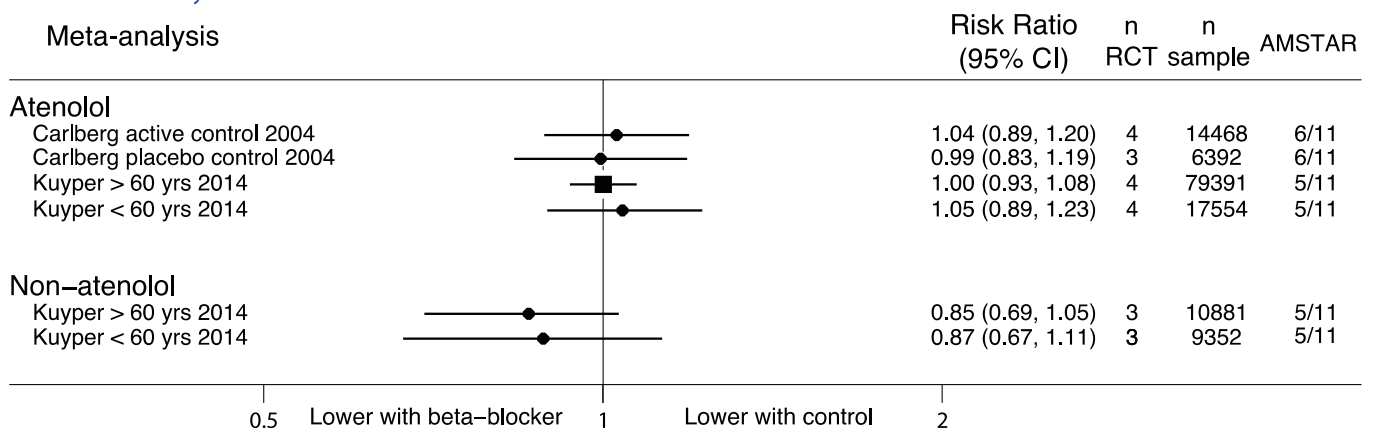

**C** Population: Hypertension meta-analyses  
Outcome: Stroke

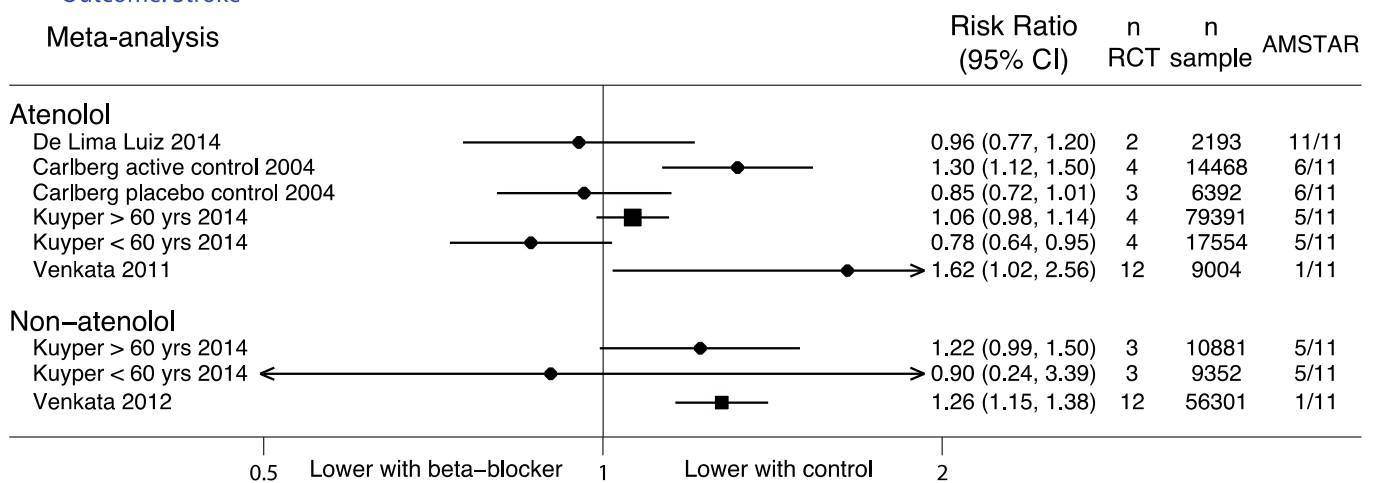

Sensitivity analysis for hypertension according to beta-blocker type (atenolol versus non-atenolol), including A) all-cause mortality; B) myocardial infarction; and C) stroke; ordered by AMSTAR.



## Supplemental References

1. Board of Erasmus MC: Follow-up investigation of academic integrity: screening of other publications by Poldermans. Report by second Follow-up Committee published on Erasmus MC website. *Erasmus MC Press Release* 2014.
2. Shea BJ, Hamel C, Wells GA, Bouter LM, Kristjansson E, Grimshaw J, Henry DA, Boers M: AMSTAR is a reliable and valid measurement tool to assess the methodological quality of systematic reviews. *Journal of clinical epidemiology* 2009, 62(10):1013-1020.
3. Whiting P, Savovic J, Higgins JP, Caldwell DM, Reeves BC, Shea B, Davies P, Kleijnen J, Churchill R, group R: ROBIS: A new tool to assess risk of bias in systematic reviews was developed. *Journal of clinical epidemiology* 2016, 69:225-234.
4. Higgins JP, Altman DG, Gotzsche PC, Juni P, Moher D, Oxman AD, Savovic J, Schulz KF, Weeks L, Sterne JA *et al*: The Cochrane Collaboration's tool for assessing risk of bias in randomised trials. *BMJ (Clinical research ed)* 2011, 343:d5928.
5. Zhang J, Yu KF: What's the relative risk? A method of correcting the odds ratio in cohort studies of common outcomes. *JAMA* 1998, 280(19):1690-1691.
6. Al-Reesi A, Al-Zadjali N, Perry J, Fergusson D, Al-Shamsi M, Al-Thagafi M, Stiell I: Do beta-blockers reduce short-term mortality following acute myocardial infarction? A systematic review and meta-analysis. *CJEM* 2008, 10(3):215-223.
7. Bangalore S, Makani H, Radford M, Thakur K, Toklu B, Katz SD, DiNicolantonio JJ, Devereaux PJ, Alexander KP, Wetterslev J *et al*: Clinical outcomes with beta-blockers for myocardial infarction: a meta-analysis of randomized trials. *Am J Med* 2014, 127(10):939-953.
8. Brandler E, Paladino L, Sinert R: Does the early administration of beta-blockers improve the in-hospital mortality rate of patients admitted with acute coronary syndrome? *Acad Emerg Med* 2010, 17(1):1-10.
9. Chatterjee S, Chaudhuri D, Vedanthan R, Fuster V, Ibanez B, Bangalore S, Mukherjee D: Early intravenous beta-blockers in patients with acute coronary syndrome--a meta-analysis of randomized trials. *International journal of cardiology* 2013, 168(2):915-921.
10. Elgendy IY, Elgendy AY, Mahmoud AN, Mansoor H, Mojaidi MK, Bavry AA: Intravenous beta-blockers for patients undergoing primary percutaneous coronary intervention: A meta-analysis of randomized trials. *International journal of cardiology* 2016, 223:891-897.
11. Freemantle N, Cleland J, Young P, Mason J, Harrison J: beta Blockade after myocardial infarction: systematic review and meta regression analysis. *BMJ (Clinical research ed)* 1999, 318(7200):1730-1737.
12. Houghton T, Freemantle N, Cleland JG: Are beta-blockers effective in patients who develop heart failure soon after myocardial infarction? A meta-regression analysis of randomised trials. *Eur J Heart Fail* 2000, 2(3):333-340.
13. Huang HL, Fox KA: The impact of beta-blockers on mortality in stable angina: a meta-analysis. *Scott Med J* 2012, 57(2):69-75.
14. Olsson G, Wikstrand J, Warnold I, Manger Cats V, McBoyle D, Herlitz J, Hjalmarson A, Sonneblich EH: Metoprolol-induced reduction in postinfarction mortality: pooled results from five double-blind randomized trials. *European heart journal* 1992, 13(1):28-32.
15. Paladino L, Sinert R, Brandler E: A review and meta-analysis of studies on the effect and timing of beta-blocker administration in patients with ST-segment elevation myocardial infarction. *Hosp Pract (1995)* 2010, 38(4):63-68.
16. Perez Marco I, Musini Vijaya M, Wright James M: Effect of early treatment with anti-hypertensive drugs on short and long-term mortality in patients with an acute cardiovascular event. In: *Cochrane Database of Systematic Reviews*. John Wiley & Sons, Ltd; 2009.
17. Soriano JB, Hoes AW, Meems L, Grobbee DE: Increased survival with beta-blockers: importance of ancillary properties. *Progress in cardiovascular diseases* 1997, 39(5):445-456.
18. Abdulla J, Kober L, Christensen E, Torp-Pedersen C: Effect of beta-blocker therapy on functional status in patients with heart failure--a meta-analysis. *Eur J Heart Fail* 2006, 8(5):522-531.

19. Al-Gobari M, El Khatib C, Pillon F, Gueyffier F: beta-Blockers for the prevention of sudden cardiac death in heart failure patients: a meta-analysis of randomized controlled trials. *BMC Cardiovasc Disord* 2013, 13:52.
20. Avezum A, Tsuyuki RT, Pogue J, Yusuf S: Beta-blocker therapy for congestive heart failure: a systemic overview and critical appraisal of the published trials. *Can J Cardiol* 1998, 14(8):1045-1053.
21. Badve SV, Roberts MA, Hawley CM, Cass A, Garg AX, Krum H, Tonkin A, Perkovic V: Effects of beta-adrenergic antagonists in patients with chronic kidney disease: a systematic review and meta-analysis. *Journal of the American College of Cardiology* 2011, 58(11):1152-1161.
22. Bavishi C, Chatterjee S, Ather S, Patel D, Messerli FH: Beta-blockers in heart failure with preserved ejection fraction: a meta-analysis. *Heart Fail Rev* 2015, 20(2):193-201.
23. Bell DS, Lukas MA, Holdbrook FK, Fowler MB: The effect of carvedilol on mortality risk in heart failure patients with diabetes: results of a meta-analysis. *Curr Med Res Opin* 2006, 22(2):287-296.
24. Burnett H, Earley A, Voors AA, Senni M, McMurray JJ, Deschaseaux C, Cope S: Thirty Years of Evidence on the Efficacy of Drug Treatments for Chronic Heart Failure With Reduced Ejection Fraction: A Network Meta-Analysis. *Circulation Heart failure* 2017, 10(1).
25. Bonet S, Agusti A, Arnau JM, Vidal X, Diogene E, Galve E, Laporte JR: Beta-adrenergic blocking agents in heart failure: benefits of vasodilating and non-vasodilating agents according to patients' characteristics: a meta-analysis of clinical trials. *Arch Intern Med* 2000, 160(5):621-627.
26. Bouzamondo A, Hulot JS, Sanchez P, Lechat P: Beta-blocker benefit according to severity of heart failure. *Eur J Heart Fail* 2003, 5(3):281-289.
27. Brophy JM, Joseph L, Rouleau JL: Beta-blockers in congestive heart failure. A Bayesian meta-analysis. *Ann Intern Med* 2001, 134(7):550-560.
28. Cleland JGF, Bunting KV, Flather MD, Altman DG, Holmes J, Coats AJS, Manzano L, McMurray JJV, Ruschitzka F, van Veldhuisen DJ *et al*: Beta-blockers for heart failure with reduced, mid-range, and preserved ejection fraction: an individual patient-level analysis of double-blind randomized trials. *European heart journal* 2018, 39(1):26-35.
29. Cleophas TJ, Zwinderman AH: Beta-blockers and heart failure: meta-analysis of mortality trials. *Int J Clin Pharmacol Ther* 2001, 39(9):383-388.
30. Dulin BR, Haas SJ, Abraham WT, Krum H: Do elderly systolic heart failure patients benefit from beta blockers to the same extent as the non-elderly? Meta-analysis of >12,000 patients in large-scale clinical trials. *The American journal of cardiology* 2005, 95(7):896-898.
31. Fauchier L, Pierre B, de Labriolle A, Babuty D: Comparison of the beneficial effect of beta-blockers on mortality in patients with ischaemic or non-ischaemic systolic heart failure: a meta-analysis of randomised controlled trials. *Eur J Heart Fail* 2007, 9(11):1136-1139.
32. Fukuta H, Goto T, Wakami K, Ohte N: The effect of beta-blockers on mortality in heart failure with preserved ejection fraction: A meta-analysis of observational cohort and randomized controlled studies. *International journal of cardiology* 2017, 228:4-10.
33. Haas SJ, Vos T, Gilbert RE, Krum H: Are  $\beta$ -blockers as efficacious in patients with diabetes mellitus as in patients without diabetes mellitus who have chronic heart failure? A meta-analysis of large-scale clinical trials. *American Heart Journal* 2003, 146(5):848-853.
34. Heidenreich PA, Lee TT, Massie BM: Effect of beta-blockade on mortality in patients with heart failure: a meta-analysis of randomized clinical trials. *Journal of the American College of Cardiology* 1997, 30(1):27-34.
35. Kotecha D, Holmes J, Krum H, Altman DG, Manzano L, Cleland JG, Lip GY, Coats AJ, Andersson B, Kirchhof P *et al*: Efficacy of beta blockers in patients with heart failure plus atrial fibrillation: an individual-patient data meta-analysis. *Lancet (London, England)* 2014, 384(9961):2235-2243.
36. Kotecha D, Manzano L, Krum H, Rosano G, Holmes J, Altman DG, Collins PD, Packer M, Wikstrand J, Coats AJ *et al*: Effect of age and sex on efficacy and tolerability of beta blockers in patients with heart failure with reduced ejection fraction: individual patient data meta-analysis. *BMJ (Clinical research ed)* 2016, 353:i1855.

37. Kotecha D, Flather MD, Altman DG, Holmes J, Rosano G, Wikstrand J, Packer M, Coats AJS, Manzano L, Bohm M *et al*: Heart Rate and Rhythm and the Benefit of Beta-Blockers in Patients With Heart Failure. *Journal of the American College of Cardiology* 2017, 69(24):2885-2896.
38. Krum H, Haas SJ, Eichhorn E, Ghali J, Gilbert E, Lechat P, Packer M, Roecker E, Verkenne P, Wedel H *et al*: Prognostic benefit of beta-blockers in patients not receiving ACE-Inhibitors. *European heart journal* 2005, 26(20):2154-2158.
39. Lechat P, Packer M, Chalon S, Cucherat M, Arab T, Boissel JP: Clinical effects of beta-adrenergic blockade in chronic heart failure: a meta-analysis of double-blind, placebo-controlled, randomized trials. *Circulation* 1998, 98(12):1184-1191.
40. Lee S, Spencer A: Beta-blockers to reduce mortality in patients with systolic dysfunction: a meta-analysis. *J Fam Pract* 2001, 50(6):499-504.
41. Liu F, Chen Y, Feng X, Teng Z, Yuan Y, Bin J: Effects of beta-blockers on heart failure with preserved ejection fraction: a meta-analysis. *PLoS One* 2014, 9(3):e90555.
42. Martin N, Manoharan K, Thomas J, Davies C, Lumbers RT: Beta-blockers and inhibitors of the renin-angiotensin aldosterone system for chronic heart failure with preserved ejection fraction. *The Cochrane database of systematic reviews* 2018, 6:CD012721.
43. McAlister FA, Wiebe N, Ezekowitz JA, Leung AA, Armstrong PW: Meta-analysis: beta-blocker dose, heart rate reduction, and death in patients with heart failure. *Ann Intern Med* 2009, 150(11):784-794.
44. Nasr IA, Bouzamondo A, Hulot JS, Dubourg O, Le Heuzey JY, Lechat P: Prevention of atrial fibrillation onset by beta-blocker treatment in heart failure: a meta-analysis. *European heart journal* 2007, 28(4):457-462.
45. O'Connor CM, Fiuzat M, Swedberg K, Caron M, Koch B, Carson PE, Gattis-Stough W, Davis GW, Bristow MR: Influence of global region on outcomes in heart failure beta-blocker trials. *Journal of the American College of Cardiology* 2011, 58(9):915-922.
46. Rienstra M, Damman K, Mulder BA, Van Gelder IC, McMurray JJ, Van Veldhuisen DJ: Beta-blockers and outcome in heart failure and atrial fibrillation: a meta-analysis. *JACC Heart Fail* 2013, 1(1):21-28.
47. Shekelle PG, Rich MW, Morton SC, Atkinson CS, Tu W, Maglione M, Rhodes S, Barrett M, Fonarow GC, Greenberg B *et al*: Efficacy of angiotensin-converting enzyme inhibitors and beta-blockers in the management of left ventricular systolic dysfunction according to race, gender, and diabetic status: a meta-analysis of major clinical trials. *Journal of the American College of Cardiology* 2003, 41(9):1529-1538.
48. Shibata MC, Flather MD, Wang D: Systematic review of the impact of beta blockers on mortality and hospital admissions in heart failure. *Eur J Heart Fail* 2001, 3(3):351-357.
49. van Veldhuisen DJ, McMurray JJ: Pharmacological treatment of heart failure with preserved ejection fraction: a glimpse of light at the end of the tunnel? *Eur J Heart Fail* 2013, 15(1):5-8.
50. Wali RK, Iyengar M, Beck GJ, Chartyan DM, Chonchol M, Lukas MA, Cooper C, Himmelfarb J, Weir MR, Berl T *et al*: Efficacy and safety of carvedilol in treatment of heart failure with chronic kidney disease: a meta-analysis of randomized trials. *Circulation Heart failure* 2011, 4(1):18-26.
51. Whorlow SL, Krum H: Meta-analysis of effect of beta-blocker therapy on mortality in patients with New York Heart Association class IV chronic congestive heart failure. *The American journal of cardiology* 2000, 86(8):886-889.
52. Zaman S, Zaman SS, Scholtes T, Shun-Shin MJ, Plymen CM, Francis DP, Cole GD: The mortality risk of deferring optimal medical therapy in heart failure: a systematic comparison against norms for surgical consent and patient information leaflets. *Eur J Heart Fail* 2017, 19(11):1401-1409.
53. Angeli F, Verdecchia P, Karthikeyan G, Mazzotta G, Gentile G, Reboldi G: ss-Blockers reduce mortality in patients undergoing high-risk non-cardiac surgery. *Am J Cardiovasc Drugs* 2010, 10(4):247-259.
54. Angeli F, Verdecchia P, Karthikeyan G, Mazzotta G, Repaci S, del Pinto M, Gentile G, Cavallini C, Reboldi G: Beta-blockers and risk of all-cause mortality in non-cardiac surgery. *Ther Adv Cardiovasc Dis* 2010, 4(2):109-118.

55. Arsenault KA, Yusuf AM, Crystal E, Healey JS, Morillo CA, Nair GM, Whitlock RP: Interventions for preventing post-operative atrial fibrillation in patients undergoing heart surgery. *The Cochrane database of systematic reviews* 2013(1):CD003611.
56. Badgett RG, Lawrence VA, Cohn SL: Variations in pharmacology of beta-blockers may contribute to heterogeneous results in trials of perioperative beta-blockade. *Anesthesiology* 2010, 113(3):585-592.
57. Bangalore S, Wetterslev J, Pranesh S, Sawhney S, Gluud C, Messerli FH: Perioperative beta blockers in patients having non-cardiac surgery: a meta-analysis. *Lancet (London, England)* 2008, 372(9654):1962-1976.
58. Biccard BM, Sear JW, Foex P: Meta-analysis of the effect of heart rate achieved by perioperative beta-adrenergic blockade on cardiovascular outcomes. *Br J Anaesth* 2008, 100(1):23-28.
59. Blessberger H, Kammler J, Domanovits H, Schlager O, Wildner B, Azar D, Schillinger M, Wiesbauer F, Steinwender C: Perioperative beta-blockers for preventing surgery-related mortality and morbidity. In: *Cochrane Database of Systematic Reviews*. John Wiley & Sons, Ltd; 2014.
60. Bouri S, Shun-Shin MJ, Cole GD, Mayet J, Francis DP: Meta-analysis of secure randomised controlled trials of beta-blockade to prevent perioperative death in non-cardiac surgery. *Heart* 2014, 100(6):456-464.
61. Dai N, Xu D, Zhang J, Wei Y, Li W, Fan B, Xu Y: Different beta-blockers and initiation time in patients undergoing noncardiac surgery: a meta-analysis. *Am J Med Sci* 2014, 347(3):235-244.
62. Devereaux PJ, Beattie WS, Choi PT, Badner NH, Guyatt GH, Villar JC, Cina CS, Leslie K, Jacka MJ, Montori VM *et al*: How strong is the evidence for the use of perioperative beta blockers in non-cardiac surgery? Systematic review and meta-analysis of randomised controlled trials. *BMJ (Clinical research ed)* 2005, 331(7512):313-321.
63. Guay J, Ochroch EA: beta-blocking agents for surgery: influence on mortality and major outcomes. A meta-analysis. *J Cardiothorac Vasc Anesth* 2013, 27(5):834-844.
64. Ji T, Feng C, Sun L, Ye X, Bai Y, Chen Q, Qin Y, Zhu J, Zhao X: Are beta-blockers effective for preventing post-coronary artery bypass grafting atrial fibrillation? Direct and network meta-analyses. *Ir J Med Sci* 2016, 185(2):503-511.
65. Khan MF, Wendel CS, Movahed MR: Prevention of post-coronary artery bypass grafting (CABG) atrial fibrillation: efficacy of prophylactic beta-blockers in the modern era: a meta-analysis of latest randomized controlled trials. *Ann Noninvasive Electrocardiol* 2013, 18(1):58-68.
66. Landoni G, Turi S, Biondi-Zoccai G, Bignami E, Testa V, Belloni I, Cornero G, Zangrillo A: Esmolol reduces perioperative ischemia in noncardiac surgery: a meta-analysis of randomized controlled studies. *J Cardiothorac Vasc Anesth* 2010, 24(2):219-229.
67. McGory ML, Maggard MA, Ko CY: A meta-analysis of perioperative beta blockade: what is the actual risk reduction? *Surgery* 2005, 138(2):171-179.
68. Mostafaie K, Bedenis R, Harrington D: Beta-adrenergic blockers for perioperative cardiac risk reduction in people undergoing vascular surgery. In: *Cochrane Database of Systematic Reviews*. vol. 10.1002/14651858.CD006342.pub2: John Wiley & Sons, Ltd; 2015.
69. Sakamoto A, Hamasaki T, Kitakaze M: Perioperative landiolol administration reduces atrial fibrillation after cardiac surgery: A meta-analysis of randomized controlled trials. *Adv Ther* 2014, 31(4):440-450.
70. Schouten O, Shaw LJ, Boersma E, Bax JJ, Kertai MD, Feringa HH, Biagini E, Kok NF, Urk H, Elhendy A *et al*: A meta-analysis of safety and effectiveness of perioperative beta-blocker use for the prevention of cardiac events in different types of noncardiac surgery. *Coronary artery disease* 2006, 17(2):173-179.
71. Talati R, Reinhart KM, White CM, Phung OJ, Sedrakyan A, Kluger J, Coleman CI: Outcomes of perioperative beta-blockade in patients undergoing noncardiac surgery: a meta-analysis. *Ann Pharmacother* 2009, 43(7):1181-1188.
72. Wang HS, Wang ZW, Yin ZT: Carvedilol for prevention of atrial fibrillation after cardiac surgery: a meta-analysis. *PLoS One* 2014, 9(4):e94005.

73. Wiesbauer F, Schlager O, Domanovits H, Wildner B, Maurer G, Muellner M, Blessberger H, Schillinger M: Perioperative beta-blockers for preventing surgery-related mortality and morbidity: a systematic review and meta-analysis. *Anesth Analg* 2007, 104(1):27-41.
74. Wijeyesundera DN, Duncan D, Nkonde-Price C, Virani SS, Washam JB, Fleischmann KE, Fleisher LA, Members AATF: Perioperative beta blockade in noncardiac surgery: a systematic review for the 2014 ACC/AHA guideline on perioperative cardiovascular evaluation and management of patients undergoing noncardiac surgery: a report of the American College of Cardiology/American Heart Association Task Force on Practice Guidelines. *Circulation* 2014, 130(24):2246-2264.
75. Zangrillo A, Turi S, Crescenzi G, Oriani A, Distaso F, Monaco F, Bignami E, Landoni G: Esmolol reduces perioperative ischemia in cardiac surgery: a meta-analysis of randomized controlled studies. *J Cardiothorac Vasc Anesth* 2009, 23(5):625-632.
76. Balamuthusamy S, Molnar J, Adigopula S, Arora R: Comparative analysis of beta-blockers with other antihypertensive agents on cardiovascular outcomes in hypertensive patients with diabetes mellitus: a systematic review and meta-analysis. *American journal of therapeutics* 2009, 16(2):133-142.
77. Bangalore S, Parkar S, Grossman E, Messerli FH: A meta-analysis of 94,492 patients with hypertension treated with beta blockers to determine the risk of new-onset diabetes mellitus. *The American journal of cardiology* 2007, 100(8):1254-1262.
78. Bangalore S, Sawhney S, Messerli FH: Relation of beta-blocker-induced heart rate lowering and cardioprotection in hypertension. *Journal of the American College of Cardiology* 2008, 52(18):1482-1489.
79. Bangalore S, Wild D, Parkar S, Kukin M, Messerli FH: Beta-Blockers for Primary Prevention of Heart Failure in Patients With Hypertension. *Journal of the American College of Cardiology* 2008, 52(13):1062-1072.
80. Bradley HA, Wiysonge CS, Volmink JA, Mayosi BM, Opie LH: How strong is the evidence for use of beta-blockers as first-line therapy for hypertension? Systematic review and meta-analysis. *J Hypertens* 2006, 24(11):2131-2141.
81. Carlberg B, Samuelsson O, Lindholm LH: Atenolol in hypertension: is it a wise choice? *Lancet (London, England)* 2004, 364(9446):1684-1689.
82. Cruickshank JM: The Role of Beta-Blockers in the Treatment of Hypertension. *Advances in experimental medicine and biology* 2017, 956:149-166.
83. De Lima Luiz G, Saconato H, Atallah Álvaro N, da Silva Edina MK: Beta-blockers for preventing stroke recurrence. In: *Cochrane Database of Systematic Reviews*. vol. 10.1002/14651858.CD007890.pub3: John Wiley & Sons, Ltd; 2014.
84. Ding FH, Li Y, Li LH, Wang JG: Impact of heart rate on central hemodynamics and stroke: a meta-analysis of beta-blocker trials. *Am J Hypertens* 2013, 26(1):118-125.
85. Jeffers BW, Robbins J, Bhambri R: Efficacy of Calcium Channel Blockers Versus Other Classes of Antihypertensive Medication in the Treatment of Hypertensive Patients With Previous Stroke and/or Coronary Artery Disease: A Systematic Review and Meta-Analysis. *American journal of therapeutics* 2017, 24(1):e68-e80.
86. Khan N, McAlister FA: Re-examining the efficacy of beta-blockers for the treatment of hypertension: a meta-analysis. *CMAJ : Canadian Medical Association journal = journal de l'Association medicale canadienne* 2006, 174(12):1737-1742.
87. Kuyper LM, Khan NA: Atenolol vs nonatenolol beta-blockers for the treatment of hypertension: a meta-analysis. *Can J Cardiol* 2014, 30(5 Suppl):S47-53.
88. Law MR, Morris JK, Wald NJ: Use of blood pressure lowering drugs in the prevention of cardiovascular disease: meta-analysis of 147 randomised trials in the context of expectations from prospective epidemiological studies. *BMJ (Clinical research ed)* 2009, 338:b1665.
89. Lindholm LH, Carlberg B, Samuelsson O: Should beta blockers remain first choice in the treatment of primary hypertension? A meta-analysis. *Lancet (London, England)* 2005, 366(9496):1545-1553.
90. Messerli FH, Grossman E, Goldbourt U: Are beta-blockers efficacious as first-line therapy for hypertension in the elderly? A systematic review. *JAMA* 1998, 279(23):1903-1907.

91. Palla M, Ando T, Androulakis E, Telila T, Briasoulis A: Renin-Angiotensin System Inhibitors vs Other Antihypertensives in Hypertensive Blacks: A Meta-Analysis. *Journal of clinical hypertension (Greenwich, Conn)* 2017, 19(4):344-350.
92. Psaty BM, Smith NL, Siscovick DS, Koepsell TD, Weiss NS, Heckbert SR, Lemaitre RN, Wagner EH, Furberg CD: Health outcomes associated with antihypertensive therapies used as first-line agents. A systematic review and meta-analysis. *JAMA* 1997, 277(9):739-745.
93. Remonti LR, Dias S, Leitao CB, Kramer CK, Klassman LP, Welton NJ, Ades AE, Gross JL: Classes of antihypertensive agents and mortality in hypertensive patients with type 2 diabetes-Network meta-analysis of randomized trials. *Journal of diabetes and its complications* 2016, 30(6):1192-1200.
94. Sciarretta S, Palano F, Tocci G, Baldini R, Volpe M: Antihypertensive treatment and development of heart failure in hypertension: a Bayesian network meta-analysis of studies in patients with hypertension and high cardiovascular risk. *Arch Intern Med* 2011, 171(5):384-394.
95. Shinton RA, Beevers DG: A meta-analysis of mortality and coronary prevention in hypertensive patients treated with beta-receptor blockers. *J Hum Hypertens* 1990, 4 Suppl 2:31-34.
96. Ram CV: Beta-blockers in hypertension. *The American journal of cardiology* 2010, 106(12):1819-1825.
97. Wang WT, You LK, Chiang CE, Sung SH, Chuang SY, Cheng HM, Chen CH: Comparative Effectiveness of Blood Pressure-lowering Drugs in Patients who have Already Suffered From Stroke: Traditional and Bayesian Network Meta-analysis of Randomized Trials. *Medicine* 2016, 95(15):e3302.
98. Wiysonge CS, Bradley HA, Volmink J, Mayosi BM, Mbewu A, Opie LH: Beta-blockers for hypertension. *The Cochrane database of systematic reviews* 2012, 11:CD002003.
99. Wiysonge CS, Bradley HA, Volmink J, Mayosi BM, Opie LH: Beta-blockers for hypertension. *The Cochrane database of systematic reviews* 2017, 1:CD002003.
100. Wright JM, Lee CH, Chambers GK: Systematic review of antihypertensive therapies: does the evidence assist in choosing a first-line drug? *CMAJ : Canadian Medical Association journal = journal de l'Association medicale canadienne* 1999, 161(1):25-32.
101. Wright JM: Choosing a first-line drug in the management of elevated blood pressure: what is the evidence? 2: Beta-blockers. *CMAJ : Canadian Medical Association journal = journal de l'Association medicale canadienne* 2000, 163(2):188-192.
102. Wright James M, Musini Vijaya M: First-line drugs for hypertension. In: *Cochrane Database of Systematic Reviews*. John Wiley & Sons, Ltd; 2009.
103. Xue H, Lu Z, Tang Wen L, Pang Lu W, Wang Gan M, Wong Gavin WK, Wright James M: First-line drugs inhibiting the renin angiotensin system versus other first-line antihypertensive drug classes for hypertension. In: *Cochrane Database of Systematic Reviews*. John Wiley & Sons, Ltd; 2015.
104. Heidenreich PA, McDonald KM, Hastie T, Fadel B, Hagan V, Lee BK, Hlatky MA: Meta-analysis of trials comparing beta-blockers, calcium antagonists, and nitrates for stable angina. *JAMA* 1999, 281(20):1927-1936.
105. Howes LG, Lykos D, Rennie GC: Effects of antihypertensive drugs on coronary artery disease risk: a meta-analysis. *Clin Exp Pharmacol Physiol* 1996, 23(6-7):555-558.
106. Huang BT, Huang FY, Zuo ZL, Liao YB, Heng Y, Wang PJ, Gui YY, Xia TL, Xin ZM, Liu W *et al*: Meta-Analysis of Relation Between Oral beta-Blocker Therapy and Outcomes in Patients With Acute Myocardial Infarction Who Underwent Percutaneous Coronary Intervention. *The American journal of cardiology* 2015, 115(11):1529-1538.
107. Jia Y, Leung SW: Comparative Efficacy of Tongxinluo Capsule and Beta-Blockers in Treating Angina Pectoris: Meta-Analysis of Randomized Controlled Trials. *J Altern Complement Med* 2015, 21(11):686-699.
108. Misumida N, Harjai K, Kernis S, Kanei Y: Does Oral Beta-Blocker Therapy Improve Long-Term Survival in ST-Segment Elevation Myocardial Infarction With Preserved Systolic Function? A Meta-Analysis. *J Cardiovasc Pharmacol Ther* 2016, 21(3):280-285.
109. Shu de F, Dong BR, Lin XF, Wu TX, Liu GJ: Long-term beta blockers for stable angina: systematic review and meta-analysis. *Eur J Prev Cardiol* 2012, 19(3):330-341.

110. Briasoulis A, Palla M, Afonso L: Meta-analysis of the effects of carvedilol versus metoprolol on all-cause mortality and hospitalizations in patients with heart failure. *The American journal of cardiology* 2015, 115(8):1111-1115.
111. Chatterjee S, Biondi-Zoccai G, Abbate A, D'Ascenzo F, Castagno D, Van Tassell B, Mukherjee D, Lichstein E: Benefits of beta blockers in patients with heart failure and reduced ejection fraction: network meta-analysis. *BMJ (Clinical research ed)* 2013, 346:f55.
112. DiNicolantonio JJ, Lavie CJ, Fares H, Menezes AR, O'Keefe JH: Meta-analysis of carvedilol versus beta 1 selective beta-blockers (atenolol, bisoprolol, metoprolol, and nebivolol). [Review]. 2013.
113. Dobre D, Haaijer-Ruskamp FM, Voors AA, van Veldhuisen DJ: beta-Adrenoceptor antagonists in elderly patients with heart failure: a critical review of their efficacy and tolerability. *Drugs Aging* 2007, 24(12):1031-1044.
114. Leizorovicz A, Lechat P, Cucherat M, Bugnard F: Bisoprolol for the treatment of chronic heart failure: a meta-analysis on individual data of two placebo-controlled studies--CIBIS and CIBIS II. Cardiac Insufficiency Bisoprolol Study. *Am Heart J* 2002, 143(2):301-307.
115. Packer M, Antonopoulos GV, Berlin JA, Chittams J, Konstam MA, Udelson JE: Comparative effects of carvedilol and metoprolol on left ventricular ejection fraction in heart failure: results of a meta-analysis. *Am Heart J* 2001, 141(6):899-907.
116. Prins KW, Neill JM, Tyler JO, Eckman PM, Duval S: Effects of Beta-Blocker Withdrawal in Acute Decompensated Heart Failure: A Systematic Review and Meta-Analysis.[Erratum appears in JACC Heart Fail. 2015 Oct;3(10):847]. 2015.
117. Zarembski DG, Nolan PE, Jr., Slack MK, Lui CY: Meta-analysis of the use of low-dose beta-adrenergic blocking therapy in idiopathic or ischemic dilated cardiomyopathy. *The American journal of cardiology* 1996, 77(14):1247-1250.
118. Crystal E, Connolly SJ, Sleik K, Ginger TJ, Yusuf S: Interventions on prevention of postoperative atrial fibrillation in patients undergoing heart surgery: a meta-analysis. *Circulation* 2002, 106(1):75-80.
119. DiNicolantonio JJ, Beavers CJ, Menezes AR, Lavie CJ, O'Keefe JH, Meier P, Vorobcsuk A, Aradi D, Komocsi A, Chatterjee S *et al*: Meta-analysis comparing carvedilol versus metoprolol for the prevention of postoperative atrial fibrillation following coronary artery bypass grafting. *The American journal of cardiology* 2014, 113(3):565-569.
120. Kaw R, Hernandez AV, Masood I, Gillinov AM, Saliba W, Blackstone EH: Short- and long-term mortality associated with new-onset atrial fibrillation after coronary artery bypass grafting: a systematic review and meta-analysis. *J Thorac Cardiovasc Surg* 2011, 141(5):1305-1312.
121. Ollila A, Vikatmaa L, Sund R, Pettila V, Wilkman E: Efficacy and safety of intravenous esmolol for cardiac protection in non-cardiac surgery. A systematic review and meta-analysis. *Annals of medicine* 2019, 51(1):17-27.
122. Yu SK, Tait G, Karkouti K, Wijeyesundera D, McCluskey S, Beattie WS: The safety of perioperative esmolol: a systematic review and meta-analysis of randomized controlled trials. *Anesth Analg* 2011, 112(2):267-281.
123. Aursnes I, Tvette IF, Gasemyr J, Natvig B: Clinical efficacies of antihypertensive drugs. *Scand Cardiovasc J* 2003, 37(2):72-79.
124. Baguet JP, Robitail S, Boyer L, Debensason D, Auquier P: A meta-analytical approach to the efficacy of antihypertensive drugs in reducing blood pressure. *Am J Cardiovasc Drugs* 2005, 5(2):131-140.
125. Baguet JP, Legallicier B, Auquier P, Robitail S: Updated meta-analytical approach to the efficacy of antihypertensive drugs in reducing blood pressure. *Clin Drug Investig* 2007, 27(11):735-753.
126. Dahlof B, Devereux RB, Kjeldsen SE, Lyle PA, Zhang Z, Edelman JM: Atenolol as a comparator in outcome trials in hypertension: a correct choice in the past, but not for the future? *Blood Press* 2007, 16(1):6-12.
127. Germino FW, Lin Y, Pejovic V, Bowen L: Efficacy and tolerability of nebivolol: does age matter? A retrospective analysis of three randomized, placebo-controlled trials in stage I-II hypertension. *Ther Adv Cardiovasc Dis* 2012, 6(5):185-199.

128. Magee LA, Elran E, Bull SB, Logan A, Koren G: Risks and benefits of beta-receptor blockers for pregnancy hypertension: overview of the randomized trials. *Eur J Obstet Gynecol Reprod Biol* 2000, 88(1):15-26.
129. Mulrow C, Lau J, Cornell J, Brand M: Pharmacotherapy for hypertension in the elderly. *The Cochrane database of systematic reviews* 2000(2):CD000028.
130. Psaty BM, Lumley T, Furberg CD, Schellenbaum G, Pahor M, Alderman MH, Weiss NS: Health outcomes associated with various antihypertensive therapies used as first-line agents: a network meta-analysis. *JAMA* 2003, 289(19):2534-2544.
131. Turnbull F, Blood Pressure Lowering Treatment Trialists C: Effects of different blood-pressure-lowering regimens on major cardiovascular events: results of prospectively-designed overviews of randomised trials. *Lancet (London, England)* 2003, 362(9395):1527-1535.
132. Turnbull F, Neal B, Algert C, Chalmers J, Chapman N, Cutler J, Woodward M, MacMahon S, Blood Pressure Lowering Treatment Trialists C: Effects of different blood pressure-lowering regimens on major cardiovascular events in individuals with and without diabetes mellitus: results of prospectively designed overviews of randomized trials. *Arch Intern Med* 2005, 165(12):1410-1419.
133. Schouten O, Shaw LJ, Boersma E, Bax JJ, Kertai MD, Feringa HH, Biagini E, Kok NF, Urk H, Elhendy A *et al*: A meta-analysis of safety and effectiveness of perioperative beta-blocker use for the prevention of cardiac events in different types of noncardiac surgery. *Coron Artery Dis* 2006, 17(2):173-9.
134. Gong Y, Wang Z, Beitelshes AL, McDonough CW, Langae TY, Hall K, Schmidt SO, Curry RW, Jr., Gums JG, Bailey KR *et al*: Pharmacogenomic Genome-Wide Meta-Analysis of Blood Pressure Response to beta-Blockers in Hypertensive African Americans. *Hypertension (Dallas, Tex : 1979)* 2016, 67(3):556-563.
